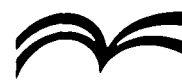

REVIEW ARTICLE

# Abscission of flowers and floral parts

Wouter G. van Doorn<sup>1,3</sup> and Anthony D. Stead<sup>2</sup>

<sup>1</sup> Agrotechnological Research Institute (ATO-DLO), PO Box 17, 6700 AA Wageningen, The Netherlands

<sup>2</sup> Department of Biology, Royal Holloway, University of London, Egham, Surrey TW200EX, UK

Received 8 May 1996; Accepted 31 October 1996

## Abstract

The abscission of inflorescences, flowers, petals, sepals, styles, and stamens is discussed, with emphasis on the anatomy and ultrastructure of the abscission zones, and the role of cell wall degrading enzymes and hormonal control. Shedding of these parts is usually due to cell wall dissolution, but abscission of petals, stamens, and styles in some species occurs due to the forces generated by the growing fruit. Flower abscission is clearly regulated by ethylene, whilst auxins apparently decrease the sensitivity to ethylene. Petal, style and stamen abscission also seems to be controlled by endogenous ethylene. Auxin is apparently involved in abscission of styles and stamens, but in petals its role is at yet unclear. The ultrastructural data indicate high protein synthesis and high secretory activity of material toward cell walls of abscission zone cells. The physiological evidence indicates a role of both polygalacturonase and cellulase in cell wall dissolution, whilst the role of other cell wall degrading enzymes is still unknown. The physiological processes occurring in the walls of the separating cells should be distinguished from those relating to defence against microbial intrusion, such as deposition of lignin and suberin and tylose formation. Experimentation using mutants and transgenic plants may aid in separating these processes. Sequencing of the isoenzymes specific for the abscission zone and a search for abscission zone-specific promoters seems a requirement for the successful evaluation of the enzymes involved in cell wall degradation.

**Key words:** Abscission, anatomy, abscission zone, hormonal control, cell wall degrading enzymes, inflorescences.

## Introduction

Abscission of plant parts is, by definition, due to dissolution of the cell walls, hence it is an active physiological process. The term abscission, derived from the Latin *abscindere*, 'to tear', is, therefore, appropriate, but in several plants some parts are shed due to growth of subtending parts, a process which also can be considered tearing, but which is to be distinguished from true abscission.

Abscission of plant reproductive organs, both inflorescences and individual flowers, is widespread and the fall of flower parts also occurs in many species; most conspicuous is petal<sup>4</sup> fall, but, depending on the species, floral parts such as sepals, styles, and stamens may also fall, and in some flowers the bracts that enclose the unopened bloom abscise.

Abscission of flower buds is also common and, although not covered in-depth in this review, its anatomy and physiology is similar to flower shedding (Crane *et al.*, 1982; Tripp and Wien, 1989; Wien *et al.*, 1989). When appropriate, some of the physiological work related to bud drop is also discussed.

This paper reviews the abscission of inflorescences, flowers and flower parts, with emphasis on (a) the anatomy and ultrastructure of the abscission zones, (b) the physiology of abscission, in particular the role of cell wall degrading enzymes and hormonal control, and (c) the (potential) use of transgenic plants to study the shedding of these parts.

## Abscission of inflorescences and flowers

In several monoecious and dioecious trees the male flowers are borne in an inflorescence, called a catkin, that

<sup>3</sup> To whom correspondence should be addressed. Fax: +31 317 475347; E-mail: W.G.vanDoorn@ato.dlo.nl

<sup>4</sup> In plants in which the perianth is not differentiated into a calyx and corolla, such as tulips, all perianth members are called tepals. These may either all abscise concurrently, but in some species the outer ring, which is analogous to the calyx, may do so just before the inner one. The fall of both petals and tepals will in this paper be indicated as petal abscission.

falls after pollen shedding (von Mohl, 1860). Examples are walnut (Juglandaceae) and several species in the Betulaceae. Inflorescences that show abscission can consist of bisexual flowers, e.g. in *Beloperone*, *Pachystachus* and olive (Woltering, 1987; Weis *et al.*, 1988). These inflorescences also often bear flower bracts, which in some species, such as *Pachystachus*, are leaf-like, and these fall with the inflorescence. Inflorescences usually fall when still fully turgid. Examples of inflorescence abscission are given in Table 1.

Gärtner (1844), in an exhaustive monograph about flowers and fertilization, described abscission of female and bisexual flowers in genera such as *Lychnis*, *Nicotiana* and *Verbascum*. Flower shedding was, in general, due to the absence of pollination or fertilization; in some species the presence of a single embryo prevented flower fall. It was concluded that in some species pollination, in the absence of fertilization, was sufficient to prevent flower fall (e.g. *Mimulus*, *Potentilla* and some *Nicotiana* species). Becquerel (1907), however, described that fertilization was a prerequisite for preventing flower fall in several other *Nicotiana* species. Similarly, in legume species the unfertilized flowers, at the top of the raceme, are often shed (Clifford *et al.*, 1992).

Fertilized flowers may also abscise, in legumes such as *Glycine max* (Abernathy *et al.*, 1977) and *Vicia faba* (Kambal, 1969; Chapman *et al.*, 1979; Gates *et al.*, 1981), for example. In cocoa (*Theobroma cacao*) up to 98% of fertilized flowers reportedly fall. The possible evolutionary reasons for investment in surplus flowers, and in fertilizing them, is discussed in detail by Stephenson (1981). Among hypotheses that have been proposed to explain the

selective advantage is a larger floral display, which would reduce uncertainties in pollinator visits. Bisexual flowers may also fall when developing abnormally, for example in *Citrus* spp. 83% of abscised flowers shed had visible abnormalities, and in peach all flowers containing aborted pistils were found to be shed (Kaska, 1989).

Male flowers may fall before, during, or after they shed their pollen. In some aquatic plants the male flowers abscise, then float on the water and shed their pollen, for example, in a number of *Elodea* spp. and *Valisneria* spp. (Pfeiffer, 1927). Male flowers of *Mercurialis* spp. (Euphorbiaceae) abscise as the anthers open; and when these flowers fall their pollen is dispersed (von Wettstein, 1916). Von Mohl (1860) described male flower abscission in *Cucumis melo* and *Ricinus communis*, after the pollen had been shed.

Male flowers usually abscise when still fully turgid. Female or bisexual flowers may also fall when still fully turgid, but in many species the petals wilt prior to flower abscission, for example, unfertilized *Yucca filamentosa* (Agavaceae) and *Tritoma uvaria* (Liliaceae; Hannig, 1913), and several orchids, such as *Phalaenopsis*. True abscission may even occur when the entire distal part is desiccated, the abscission zone cells apparently remain alive and active. Several examples of flower abscission are included in Table 2.

The stem segment just underneath individual flowers, called the pedicel, often contains a morphologically distinct abscission zone. This zone is usually situated either at the top or base, but in some species it is just above the base (e.g. *Asparagus*; Gärtner, 1844; Hannig, 1913) or just below the top (*Citrus* spp.; Einset *et al.*, 1979). In several *Prunus* species it is located in the lower part of the floral cup, which consists of fused basal portions of sepals, petals and stamens (Simons, 1973). The location of the abscission zone in several other species has been described by Stephenson (1981), Woltering (1986), and McKenzie and Lovell (1992b). The presence of an abscission zone does not necessarily lead to abscission. In commercial cut rose flowers, for example, an abscission zone is present at the pedicel base, and although flowers usually remain unfertilized, only in a few cultivars does this zone become functional (van Doorn and Schröder, 1995).

Flower abscission is commercially important as it limits fruit set of plants such as walnut (*Juglans regia*; Catlin and Olsson, 1990), field bean (*Vicia faba*; Kambal, 1969), snap bean (*Phaseolus vulgaris*; Webster and Chiu, 1975), soybean (*Glycine max*; Huff and Dybing, 1980), mung-bean (*Vigna radiata*; Poehlman, 1991), cowpea (*Vigna unguiculata*; Ojehomon, 1972), lemon, orange, mandarin, and grapefruit (*Citrus* spp.; Einset *et al.*, 1979). It is also often a limiting factor in the trade of several flowering potted plants (Cameron and Reid, 1981, 1983; Hoyer, 1982; van Leeuwen, 1985; Woltering, 1986).

**Table 1.** Examples of inflorescence abscission, as related to the plant families

Data from Gärtner (1844), Wacker (1911), Namikawa (1926), Pfeiffer (1928), Weis *et al.* (1988), and Woltering (1987). Classification according to Cronquist (1988).

|                     |                           | Type of flowers borne on the inflorescence |
|---------------------|---------------------------|--------------------------------------------|
| <b>Dicotyledons</b> |                           |                                            |
| Acanthaceae         | <i>Beloperone guttata</i> | Bisexual                                   |
|                     | <i>Pachystachus lutea</i> | Bisexual                                   |
| Betulaceae          | <i>Alnus</i> spp.         | Staminate                                  |
|                     | <i>Betula</i> spp.        | Staminate                                  |
|                     | <i>Carpinus</i> spp.      | Staminate                                  |
|                     | <i>Corylus</i> spp.       | Staminate                                  |
| Fagaceae            | <i>Castanea</i> spp.      | Staminate                                  |
|                     | <i>Fagus</i> spp.         | Staminate                                  |
|                     | <i>Quercus</i> spp.       | Staminate                                  |
| Hippocastanaceae    | <i>Aesculus</i> spp.      | Staminate                                  |
| Juglandaceae        | <i>Juglans</i> spp.       | Staminate                                  |
|                     | <i>Pterocarya</i> spp.    | Staminate                                  |
| Myricaceae          | <i>Myrica</i> spp.        | Staminate                                  |
| Oleaceae            | <i>Olea europea</i>       | Bisexual                                   |
| Salicaceae          | <i>Populus</i> spp.       | Staminate                                  |
|                     | <i>Salix</i> spp.         | Staminate                                  |

**Table 2.** Examples of families and species showing flower abscission

Data from Gärtner (1844). von Mohl (1860), Wacker (1911). Pfeiffer (1928). Simons (1973). Woltering (1986; 1987). Classification according to Cronquist (1988).

|                       |                                                                                                                                                                                                                                                                                                               |
|-----------------------|---------------------------------------------------------------------------------------------------------------------------------------------------------------------------------------------------------------------------------------------------------------------------------------------------------------|
| <b>Monocotyledons</b> |                                                                                                                                                                                                                                                                                                               |
| Agavaceae             | <i>Aloe plicatis</i> , <i>Beschorneria yuccoides</i> , <i>Dianella nigra</i> , <i>Phormium tenax</i> , <i>Polianthes tuberosa</i> , <i>Sansevieria trifasciata</i> , <i>Yucca</i> spp.                                                                                                                        |
| Arecaceae             | <i>Phoenix robelinii</i> , <i>Rhopalostylis sapida</i> , <i>Washingtonia robusta</i>                                                                                                                                                                                                                          |
| Cannaceae             | <i>Canna × generalis</i>                                                                                                                                                                                                                                                                                      |
| Iridaceae             | <i>Diplarrhena moraea</i> , <i>Iris wattii</i> , <i>Sisyrinchium striatum</i>                                                                                                                                                                                                                                 |
| Liliaceae             | <i>Arthropodium cirrhatum</i> , <i>Asparagus crispus</i> , <i>A. plumosa</i> , <i>Chlorophytum comosum</i> , <i>Gasteria verrucosa</i> , <i>G. picta</i> , <i>Haworthia attenuata</i> , <i>Hemerocallis flava</i> , <i>H. flava</i> , <i>Hosta undulata</i> , <i>Kniphofia uvaria</i> , <i>Tritoma uvaria</i> |
| Maranthaceae          | <i>Marantha leuconora</i>                                                                                                                                                                                                                                                                                     |
| Orchidaceae           | <i>Cymbidium</i> spp. <i>Epidendrum candicans</i>                                                                                                                                                                                                                                                             |
| <b>Dicotyledons</b>   |                                                                                                                                                                                                                                                                                                               |
| Anacardiaceae         | <i>Mangifera indica</i>                                                                                                                                                                                                                                                                                       |
| Asclepiadaceae        | <i>Asclepias syriaca</i>                                                                                                                                                                                                                                                                                      |
| Balsaminaceae         | <i>Impatiens</i> spp.                                                                                                                                                                                                                                                                                         |
| Begoniaceae           | <i>Begonia</i> spp.                                                                                                                                                                                                                                                                                           |
| Bignoniaceae          | <i>Campsis radicans</i> , <i>Catalpa speciosa</i>                                                                                                                                                                                                                                                             |
| Cactaceae             | <i>Schlumbergera</i> spp.                                                                                                                                                                                                                                                                                     |
| Caprifoliaceae        | <i>Lonicera segreciensis</i>                                                                                                                                                                                                                                                                                  |
| Caryophyllaceae       | <i>Dianthus</i> spp., <i>Lychnis</i> spp.                                                                                                                                                                                                                                                                     |
| Cucurbitaceae         | <i>Cucumis melo</i>                                                                                                                                                                                                                                                                                           |
| Euphorbiaceae         | <i>Euphorbia fulgens</i> , <i>Hevea brasiliensis</i> , <i>Mercurialis</i> spp., <i>Ricinus communis</i>                                                                                                                                                                                                       |
| Fagaceae              | <i>Quercus alba</i>                                                                                                                                                                                                                                                                                           |
| Labiatae              | <i>Salvia</i> spp., <i>Westringia longifolia</i>                                                                                                                                                                                                                                                              |
| Lythraceae            | <i>Cuphea</i> spp., <i>Lythrum salicaria</i>                                                                                                                                                                                                                                                                  |
| Malvaceae             | <i>Hibiscus rosa-sinensis</i>                                                                                                                                                                                                                                                                                 |
| Nyctaginaceae         | <i>Mirabilis</i> spp., <i>Oxybaphus viscosus</i>                                                                                                                                                                                                                                                              |
| Onagraceae            | <i>Fuchsia</i> spp.                                                                                                                                                                                                                                                                                           |
| Papilionaceae         | <i>Glycine max</i> , <i>Phaseolus multiflorus</i> , <i>Vigna radiata</i> , <i>Wisteria chinensis</i>                                                                                                                                                                                                          |
| Primulaceae           | <i>Anagallis</i> spp., <i>Primula</i> spp.                                                                                                                                                                                                                                                                    |
| Proteaceae            | <i>Macademia ternifolia</i>                                                                                                                                                                                                                                                                                   |
| Rosaceae              | <i>Prunus</i> spp., <i>Pyrus malus</i> , <i>Rosa</i> spp.                                                                                                                                                                                                                                                     |
| Rutaceae              | <i>Citrus</i> spp.                                                                                                                                                                                                                                                                                            |
| Saxifragaceae         | <i>Ribes</i> spp.                                                                                                                                                                                                                                                                                             |
| Scrophulariaceae      | <i>Verbascum</i> spp., <i>Veronica</i> spp.                                                                                                                                                                                                                                                                   |
| Solanaceae            | <i>Atropa belladonna</i> , <i>Browallia demissa</i> , <i>Capsicum annum</i> , <i>Datura stramonium</i> , <i>Lochroma coccinea</i> , <i>Lycium europaeum</i> , <i>Lycopersicon esculentum</i> , <i>Nicotiana</i> spp., <i>Solanum tuberosum</i>                                                                |
| Sterculiaceae         | <i>Theobroma cacao</i>                                                                                                                                                                                                                                                                                        |
| Verbenaceae           | <i>Clerodendron</i> spp.                                                                                                                                                                                                                                                                                      |

## Petal abscission

Several early authors noted that abscission of turgid petals is generally consistent at the family level (Gärtner, 1844; Darwin, 1877; Wacker, 1911; Pfeiffer, 1928). This was more recently confirmed (Woltering and van Doorn, 1988; McKenzie and Lovell, 1992a). The generalization does not apply to all families, though; in the Iridaceae, Ericaceae and Primulaceae, for example, abscission of turgid petals is found in some species and petal wilting, either clearly prior to abscission or not followed by abscission, in others.

Table 3A shows a number of families in which petals are usually shed while fully turgid. Interestingly, this is largely restricted to the dicots as petals abscising from monocots usually show signs of partial wilting or withering (McKenzie and Lovell, 1992a). Table 3B shows families in which petals generally wilt prior to their fall.

Reiche (1885) concluded that in several species the petals fell due to fruit growth rather than cell wall

dissolution in an abscission zone. Shedding due to fruit growth was observed in some families in which most species drop their petals when still fully turgid, such as Boraginaceae (e.g. *Symphytum*, *Pulmonaria*), and some species in the Labiateae and Scrophulariaceae. It was also found in species where petal wilting precedes shedding, for example in several Convulvulaceae, Malvaceae and Solanaceae tested.

In some species the petals desiccate, but remain attached to the developing fruit. This occurs in several monocots, for example, in several Liliaceae and Iridaceae species, and in dicot families such as Cucurbitaceae, Gentianaceae, Hypericaceae, and Campanulaceae (Reiche 1885; Wacker, 1911; Pfeiffer, 1928). Petals may in some species also remain attached to the developing fruit, while staying fully turgid and showing growth, e.g. in several Polygonaceae studied by Reiche (1885). In *Rumex*, for example, the three innermost perigon leaves grow and surround the developing fruit. Similar observations were made in some monocots (*Eucomis punctata*,

**Table 3. (A)** Examples of families containing several species showing shedding of turgid petals, and data on sepal fall in these families, when available

Data from Gärtner (1844), Reiche (1885), Wacker (1911), Fitting (1921), Namikawa (1926), Pfeiffer (1928), Woltering (1986), Woltering and van Doorn (1988), and unpublished observations. n.a.: not applicable. The words 'some' or 'several' in the first column implies that other flowers from that family reportedly exhibit abscission after petal wilting or that the petals remain. Classification according to Cronquist (1988).

| Sepal abscission    |                                                                                                                                          |
|---------------------|------------------------------------------------------------------------------------------------------------------------------------------|
| <b>Dicotyledons</b> |                                                                                                                                          |
| Apocynaceae         | Sepals remain                                                                                                                            |
| Balsaminaceae       | Sepals fall at about same time as petals                                                                                                 |
| Boraginaceae        | Sepals remain                                                                                                                            |
| Cistaceae           | Sepals remain                                                                                                                            |
| several Ericaceae   | Sepals remain                                                                                                                            |
| Geraniaceae         | Sepals remain                                                                                                                            |
| Gesneriaceae        | Sepals remain                                                                                                                            |
| Labiatae*           | Sepals remain                                                                                                                            |
| Linaceae            | Sepals remain                                                                                                                            |
| Lythraceae          | Sepals remain                                                                                                                            |
| Magnoliaceae        | n.a. (usually perigon)                                                                                                                   |
| Menyanthaceae       |                                                                                                                                          |
| Myrtaceae           |                                                                                                                                          |
| Nymphaeaceae        | Sepals fall                                                                                                                              |
| some Onagraceae     | Sepals fall                                                                                                                              |
| Papaveraceae        | Sepals (calyptra) often fall before petals                                                                                               |
| Polygalaceae        | Sepals fall                                                                                                                              |
| several Primulaceae | Sepals remain                                                                                                                            |
| Ranunculaceae       | Sepals, when present, fall                                                                                                               |
| Rosaceae            | Sepals remain                                                                                                                            |
| Rutaceae            | Sepals remain                                                                                                                            |
| Saxifragaceae       | Sepals remain                                                                                                                            |
| Scrophulariaceae    | Sepals remain, in some species they grow considerably (e.g. <i>Euphrasia</i> , <i>Mimulus</i> , <i>Pedicularis</i> , <i>Rhinanthus</i> ) |
| some Solanaceae     | Sepals of species showing petal abscission grow considerably (e.g. <i>Physalis</i> , <i>Nicandra</i> ), forming a balloon-like structure |

\*The corolla of the Labiatae generally falls turgid, but in some species it falls (slightly) wilted.

*Paris quadrifolia*, *Veratrum nigrum*, and *V. album*; all Liliaceae) by Wacker (1911).

In a few species pollination is assisted by petal abscission. In *Mimulus guttatus* (Scrophulariaceae) the stamens are connected to the corolla, which is shed fully turgid. As the anthers touch the stigma this results in selfing (Dole, 1990). However, similar suggestions by Darwin (1877) in respect to *Digitalis* were not confirmed in more recent studies (Stead and Moore, 1983).

Petal abscission is often hastened by pollination or fertilization. Gärtner (1844), for example, showed earlier petal shedding after pollination in a range of species. However, in several other species tested, no effect of pollination on the time to abscission was found, in *Geranium molle* and in *Linum* species, for example (Fitting, 1911).

Petal abscission is an important factor in potted plants trade, where several species show extensive petal shattering (Woltering, 1986). Precocious petal abscission is

**Table 3. (B)** Examples of families containing several species showing petal shedding shortly after they wilt, and some data on sepal fall in these families

Data from Reiche (1885), Wacker (1911), Fitting (1921), Namikawa (1926), Pfeiffer (1928), and unpublished observations. n.a.: not applicable. The words 'some' or 'several' in the first column implies that other flowers from that family exhibit abscission of turgid petals or that petals remain. Classification according to Cronquist (1988).

| Sepal abscission      |                                                                                                                                            |
|-----------------------|--------------------------------------------------------------------------------------------------------------------------------------------|
| <b>Monocotyledons</b> |                                                                                                                                            |
| Cannaceae             | Sepals remain                                                                                                                              |
| Commelinaceae         | Sepals remain                                                                                                                              |
| some Iridaceae        | n.a. (perigon)                                                                                                                             |
| some Liliaceae        | n.a. (perigon)                                                                                                                             |
| <b>Dicotyledons</b>   |                                                                                                                                            |
| Asteraceae            | Sepals usually remain                                                                                                                      |
| Berberidaceae         | Sepals fall                                                                                                                                |
| Convolvulaceae        | Sepals remain                                                                                                                              |
| Cruciferae            | Sepals fall or remain                                                                                                                      |
| some Cucurbitaceae    | Sepals fall                                                                                                                                |
| Hypericaceae          | Sepals remain                                                                                                                              |
| Malvaceae             | Sepals remain                                                                                                                              |
| some Onagraceae       | Sepals fall together with petals, when having a common abscission zone, or sepals fall after the petals when abscission zones are separate |
| Polemoniaceae         | Sepals remain                                                                                                                              |
| Portulacaceae         | Sepals fall or remain                                                                                                                      |
| Rutaceae              | Sepals remain                                                                                                                              |
| several Solanaceae    | Sepals fall or remain                                                                                                                      |
| Umbelliferae          | Sepals remain                                                                                                                              |
| Verbenaceae           | Sepals remain                                                                                                                              |
| Violaceae             | Sepals remain                                                                                                                              |

also a characteristic of many cut flowers (Fischer, 1949; Woltering and van Doorn, 1988). Without a treatment that reduces petal fall, for example with anionic silver thiosulphate complex (STS, an inhibitor of ethylene action), most of these flowers would not be marketable (van Doorn and Woltering, 1991).

### Sepal abscission

Wacker (1911) and Fitting (1921) noted that sepals may fall prior to petals in plants such as Papaveraceae, at the same time, as in several Cruciferae, or, most commonly, after petal fall. In many other plants only the petals fall, whilst the sepals remain attached, for example, in many Rosaceae species.

In the Papaveraceae, for example *Chelidonium* and *Eschscholzia*, the sepals remain united at their top, forming a cap (Wacker, 1911; Addicott, 1982) which is abscised as the flower opens. In *Eucalyptus* spp. a similar cap (calyptra) occurs, which, depending on the species, may be derived from sepals, petals, or from both. The calyptra falls upon flower opening (Addicott, 1982).

In most plant families the sepals remain attached and desiccate. In a few plants (some Scrophulariaceae, for example) the sepals grow, following fertilization, thereby covering the ovary. or, as in *Physalis* (Solanaceae), form

a structure at some distance from the ovary (Reiche, 1885). Sepal growth is observed in several species of the Asteraceae, Dilleniaceae, Malvaceae, and Labiatae (Endress, 1994), where the sepals take part in fruit development. Data on sepal abscission are included in Table 3A and B. The type of sepal abscission is often consistent within families, though in some families both falling and persistent sepals occur.

**Abscission of stamens and styles**

Depending on flower morphology, stamens may fall separately, or with the petals when they are epipetalous. Generally, stamens that are not attached to the petals wilt and remain attached, irrespective of the type of petal senescence (abscission or wilting). In these instances the dried stamens can be observed attached to the fruit. If the stamens are shed it occurs when they are either fully turgid, partially or completely wilted or even after desiccation (Table 4). When the stamens fall after desiccation it may relate to mechanical tearing by the growing fruit rather than true abscission.

In a few species the anthers may also abscise from the filament, for example, in *Geranium* spp. where the filaments subsequently desiccate and remain attached (Table 4). In other species an abscission zone is found at the filament base (von Mohl, 1860).

The styles of many plants desiccate and remain attached to the developing fruit, but in some families they abscise (von Mohl, 1860; McKenzie and Lovell, 1992a). Abscission may occur when styles are still fully turgid, for example in some Liliaceae, Rutaceae (*Citrus* spp.) and Rosaceae, or after wilting, e.g. in *Eucalyptus* species

(Moncur and Boland, 1989). Styles may also fall after desiccation, in Boraginaceae and Onagraceae for example, but it is not clear whether in these cases their fall is due to true abscission or a mechanical effect by the growing fruit (Wacker, 1911). Examples of style shedding are given in Table 5. Families in which the styles generally are not shed include Linaceae, Polemoniaceae, Scrophulariaceae, Verbenaceae, and Violaceae.

The style abscission zone is usually located at its base, e.g. in apple (Simons *et al.*, 1970) and *Prunus* species (Simons, 1973). In other species the zone is located just above the base (e.g. *Geum*; Hannig, 1913, and *Citrus*; Einset *et al.*, 1979). The position of the style abscission zone is variable in the genus *Eucalyptus* and in some species it is absent (von Guttenberg, 1926).

**Abscission zone anatomy and ultrastructure**

Details of the development and anatomy of the abscission zone in male catkins were presented by Namikawa (1926). The abscission zones in pedicels have been described e.g. by Hannig (1913) and petal abscission zones by Reiche (1885) and Pfeiffer (1928).

These authors identified, on the basis of cell anatomy, three types of abscission zone.

(a) *Cells of the abscission zone smaller than adjacent cells but predominantly isodiametric* observed in certain inflorescences or individual flowers, for example, in the pedicel of *Salvia* species or *Solanum nigrum* flowers, and in male inflorescences of *Quercus robur*. The abscission zone cells often have a thinner wall than the neighbouring ones. Similarly the abscission zone of petals from numerous species, e.g. *Pelargonium* (Evensen *et al.*, 1993b), *Linum lewisii* (Wiatr, 1978) and *Geranium robertianum* (Sexton *et al.*, 1983), the filaments of *Calodendrum*, *Dictamnus*, *Lilium*, and *Liriodendron*, and the styles of *Lilium* and *Lonicera* all have small isodiametric cells (Pfeiffer, 1928).

**Table 4.** *The relationship of stamen fall with plant families*

As the number of genera investigated in each family is small, the indication of a family does not imply that the phenomenon is of general occurrence in that family. When some species from a family show a phenomenon the word 'some' is used. Data from Wacker (1911), and unpublished observations. Classification according to Cronquist (1988).

**Monocotyledons**

- Fall while fully turgid or somewhat wilted, with the petals (some Liliaceae)
- Fall following desiccation, but prior to petal fall (some Liliaceae)

**Dicotyledons**

- Fall of the anthers; the filaments desiccate but remain (some Geraniaceae)
- Fall of stamens while fully turgid, before petal abscission (Balsaminaceae; some Papaveraceae)
- Fall of stamens while turgid or somewhat wilted with or shortly after the (almost) turgid petals (Acanthaceae, Boraginaceae, Gesneraceae, Labiatae, some Papaveraceae, Rutaceae, Scrophulariaceae)
- Stamens fall when wilted, with the wilted petals (Convulvulaceae, Cruciferae, Malvaceae, Polemoniaceae, Portulacaceae, Solanaceae, Verbenaceae)
- Stamens desiccate, then fall with or after the petals (Berberidaceae, Onagraceae, Ranunculaceae, Violaceae)

**Table 5.** *The relationship of style shedding with plant families*

As the number of genera investigated in each family is small, the indication of a family does not imply that the phenomenon is of general occurrence in that family. When some species from a family show a phenomenon the word 'some' is used. Data from Wacker (1911), and unpublished observations. Classification according to Cronquist (1988).

**Monocotyledons**

- Fall while fully turgid or somewhat wilted (some Liliaceae and Iridaceae)
- Fall following desiccation (some Liliaceae)

**Dicotyledons**

- Fall while fully turgid or somewhat wilted (some Rosaceae, some Rutaceae, some Solanaceae)
- Fall following wilting, together with wilted petals and stamens (Convulvulaceae, Malvaceae)
- Fall after desiccation (Boraginaceae, Berberidaceae, Onagraceae)

(b) *Cells of the abscission zone smaller than adjacent cells but predominantly oblong*, for example, the cells of the abscission zone of *Aesculus* inflorescences and the pedicel of *Begonia* flowers which are oblong in the direction of the zone. These cells are often club-like at their poles, for example in petals of several *Fuchsia* species (Hannig, 1913; Pfeiffer, 1928).

(c) *Cells of the abscission zone of similar size to adjacent cells*, for example, in flowers of *Nicotiana* and *Solanum* species and *Phaseolus vulgaris* (Hannig, 1913; Pfeiffer, 1928; Yager, 1957; Lieberman *et al.*, 1983; Webster and Chiu, 1975), tomato (Roberts *et al.*, 1984). In sepals of *Magnolia* (Wacker, 1911), for example, and in petals and styles, of several species (Pfeiffer, 1928), the abscission zone cells are similar in size to the adjacent cells.

Light and electron microscopy on petal abscission zones of *Geranium robertianum* (Sexton *et al.*, 1983) and *P. × hortorum* (Evensen *et al.*, 1993b) showed that the volume of intercellular space increased as the flowers developed. Just before abscission the middle lamella was extensively degraded and in transverse sections, some cells in the zone eventually appeared to have no point of contact with most of their surrounding cells (Evensen *et al.*, 1993b).

The role of changes in cell size during abscission is as yet unclear. A drop in osmotic potential in abscission zone cells has been observed, and expansion of the separation zone cells has been extensively reported (Kendall, 1918; Pfeiffer, 1928; Sexton and Roberts, 1982). Cell swelling has been suggested to assist in breaking of the vascular strands. In abscission zones of soybean (Oberholster *et al.*, 1991) and field bean (Gates *et al.*, 1981) flowers, cell swelling has also been observed, but such swollen cells were apparently not present in the separation zone of tobacco and tomato pedicels (Jensen and Valdovinos, 1968), nor in pedicels of *Phaseolus* flowers (Webster and Chiu, 1975). It is, however, not always clear from reports in which no swollen cells were noted whether the authors had sought to prevent cell collapse. In a study on Solanaceous plants, Kendall (1918) relates turgor increase and cell swelling to the presence of starch grains in the separation layer cells, which are present in some but absent in other species.

Starch deposition in abscission zone cells was observed in flower pedicels of *Hibiscus* (Gilliland *et al.*, 1976). The number of amyloplasts in abscission zone cells of *Phaseolus* pedicels was higher than in adjacent cells (Oberholster *et al.*, 1991). Amyloplasts were also observed in the abscission layer of *Citrus* (Shiraishi and Yanagisawa, 1988) and *Magnolia* petals, in the latter they were found to disappear just prior to abscission (Addicott and Lynch, 1955). Accumulation of amyloplasts occurred in 1–3 cell layers on each side of the separation zone in *Magnolia* sepals (Wacker, 1911). In *Crocasmia* petal abscission zones, however, the number of amyloplasts

was lower than in the neighbouring cells (McKenzie and Lovell, 1992b), which indicates that starch accumulation is not a prerequisite for abscission.

Cell division may be absent prior to abscission, as in the pedicel of tobacco (Kendall, 1918; Jensen and Valdovinos, 1967), tomato (Jensen and Valdovinos, 1967; Roberts *et al.*, 1984), and several other solanaceous genera (Kendall, 1918), in *Begonia* flowers (Hänisch ten Cate *et al.*, 1973) and *Phaseolus vulgaris* (Webster and Chiu, 1975), but small cells were observed in soybean (*Glycine max*) flowers stalks (Oberholster *et al.*, 1991), reminiscent of leaf abscission zones where cell division may precede cell wall dissolution in some species (Webster, 1968; Sexton and Roberts, 1982; Sexton *et al.*, 1977). Cell division was also observed catkin stalks of *Salix* and *Castanea*. In *Salix*, division occurred not in the actual separation layer, but in a layer beneath it. In *Betula* catkins, cell division was observed on the proximal surface, after abscission. The newly formed cells became lignified and suberized. These results suggested that cell division is not universal, but when it occurs it is often located outside the actual separation layer and concerned with the formation of protecting tissue (Namikawa, 1926). Ethephon treatment stimulated abscission in *Glycine max* flowers, but it inhibited secondary cell division (Oberholster *et al.*, 1991), which also indicates that cell division is not essential to the separation process.

Abscission is often accompanied by the formation of tyloses, i.e. balloon-shaped outgrowths of ray cells, sometimes of paratracheal parenchyma cells, into the lumen of xylem conduits (Chattaway, 1948). Tyloses may aid in protecting distal plant parts from pathogen invasion (Lee, 1911). Tylose formation has often been observed in leaf abscission (Lee, 1911; Brown and Addicott, 1950; Leinweber and Hall, 1959; Scott *et al.*, 1964; Bornman *et al.*, 1967), and has also been found in soybean pedicels (Oberholster *et al.*, 1991), but has apparently not been reported in abscission zones of floral parts.

In an excellent series of papers, the group of Valdovinos and Jensen described the ultrastructure of the abscission zone cells in tobacco and tomato pedicels. Numerous rough endoplasmatic reticulum profiles were found at an early stage and probably relate to synthesis of proteins involved in wall breakdown. Along the entire cell wall the plasma membrane showed invaginations; it was suggested that this was due to microbodies depositing material into the cell wall region. Cell separation started at the middle lamellae in both tobacco and tomato, and in tobacco evidence for degradation of the primary wall was also found. During degradation, cell walls appeared to swell, then invaginated (Jensen and Valdovinos, 1967, 1968; Valdovinos and Jensen, 1968; Valdovinos *et al.*, 1972). Similar observations were made in pedicel abscission zones of *Phaseolus vulgaris* (Webster and Chiu, 1975) and soybean (Oberholster *et al.*, 1991) flowers.

Transmission electron microscopy on *Pelargonium* × hortorum showed that cells at the proximal fracture face were seemingly senescent, as the tonoplast and plasma membrane were no longer intact and the cells were almost devoid of recognizable organelles. The cells at the distal fracture face (the petal base) were somewhat less disrupted, but also showed signs of senescence such as a low number of intact organelles (Evensen *et al.*, 1993b).

From these observations, and those on cells in leaf abscission zones (Webster, 1973; Osborne and Sargent, 1976; Sexton *et al.*, 1977; Bonghi *et al.*, 1993), the picture emerges that the earliest changes in abscission zone cells are an increase in rough endoplasmic reticulum and the number of ribosomes, both indicating increased protein synthesis. Cell wall degradation, particularly at the middle lamella, occurs next, followed, in some species, by partial or complete autolysis of the cell contents. Cell swelling seems an integral part of abscission, in some species at least.

## The physiology of abscission of flowers and flower parts

### Mineral nutrition, carbohydrates, water stress

In several species the proportion of pollinated flowers that set fruit decreases as the number of pollinated flowers on an individual plant or an inflorescence increases. The physiological causes of resource-limited abscission of flowers is, however, still largely unknown. Ovules fertilized first may have a temporal advantage and may prevent the fertilization of other ovules, which may then be abscised with the rest of the reproductive parts (Lee, 1988). Abscission of fertilized flowers may also be regulated by the availability of resources (Lee, 1988; Stephenson, 1981). Increasing the available mineral nutrients in *Pisum sativum* decreased flower bud abscission by 75% (Nightingale and Farnham, 1936). In citrus a higher rate of flower abscission was correlated with a lower level of micronutrients such as zinc (Kaska, 1989).

Carbohydrate partitioning in abscising structures has only been investigated in a few species. Photosynthate competition between reproductive and vegetative sinks has been suggested to play a role in the abscission of *Vicia faba* flowers (Aufhhammer *et al.*, 1987). Similarly, the results of Turner and Wien (1994) and Aloni *et al.* (1996) indicate that competition for assimilates between flowers and the adjacent young leaves may partially determine flower fall in pepper. Pate and Farrington (1981) noted that, prior to abscission, flowers of *Lupinus angustifolius* accumulated less <sup>14</sup>C assimilate than flowers which would not later abscise. Flower abscission in walnut has also been suggested to be related to competition for carbohydrates (Deng *et al.*, 1991), although previously several years of field measurements failed to establish

such a relationship (Catlin *et al.*, 1987). Petal abscission in roses is insensitive to petal carbohydrate levels (van Doorn and Voginovic, 1996).

A decrease in water potential could increase abscission, due to increased ethylene synthesis (Apelbaum and Yang, 1981), whilst a further decrease in water potential may decrease abscission, due to inhibited metabolism. In abscission of rose petals, a decrease in water potential was, however, not found to advance abscission, and inhibition of abscission occurred only at a rather extreme water potential (below -2.0 MPa within 5 d following flower opening; van Doorn and Vojinovic, 1996).

### Protein synthesis

Abscission apparently requires *de novo* protein synthesis, as treatment with cycloheximide, an inhibitor of translation, strongly inhibited tobacco flower abscission (Valdovinos and Jensen, 1973) and petal abscission in *Pelargonium* × hortorum (Evensen *et al.*, 1993a). Actinomycin D, an inhibitor of mRNA synthesis, reduced petal abscission in *Pelargonium* × hortorum to about one-quarter of that of the controls (Evensen *et al.*, 1993a), but had no effect on petal abscission in *P. × domesticum* (Evensen *et al.*, 1993a), nor on tobacco flower abscission (Henry *et al.*, 1974). The absence of an actinomycin D effect in some systems may relate to inadequate transport to and/or uptake by nuclei of abscission zone cells or, alternatively, the mRNA maybe synthesized much earlier.

Protein levels, expressed per unit fresh weight, doubled just prior to petal abscission in *Pelargonium* × hortorum, and several new proteins were found (Evensen *et al.*, 1993b), indicative of active protein synthesis.

### Cell wall modification

Cell wall degradation in abscission zones has mainly been studied in leaves, and even for leaves it has not been characterized in detail. Prior to leaf abscission, levels of insoluble wall pectins decreased and the level of soluble pectic acids increased (Osborne, 1989). This led to the hypothesis that pectins are degraded and their bonds with other molecules cleaved, by hydrolytic enzymes. Cell wall disassembly may also involve cleavage of cellulose and hemicellulose.

A number of the enzymes involved in cell wall degradation have been characterized in relation to fruit ripening and include pectin esterase (PE; sometimes called pectinmethyl esterase), endo-polygalacturonases (PG), exo-polygalacturonase, rhamnogalacturonidase,  $\alpha$ -galactosidase and  $\beta$ -galactosidase, hemicellulases, and cellulase. The latter, endo-1,4- $\beta$ -D-glucanase—usually called cellulase although it is not certain that it can use cellulose as a substrate—hydrolyses  $\beta$ -1,4-D-glucosyl bonds which occur, apart from cellulose, in xyloglucans and other type of glucans. Xyloglucan, an important hemicellulose, can

be hydrolysed by a number of enzymes, e.g. xyloglucan endotransglycosylase (XET). Exo-polygalacturonase has been related to the late stages of peach ripening (Downs *et al.*, 1992), rhamnogalacturonidase may be involved in early stages of cell wall degradation in tomatoes (Melotto *et al.*, 1994), and both  $\alpha$ -galactosidase and a  $\beta$ -galactosidase with exo-galactanase activity may be involved in cell wall degradation in tomato fruits (Carey *et al.*, 1995; Carrington and Pressey, 1996). XET activity increases considerably during kiwi (Redgwell and Fry, 1993) and tomato (Machlachlan and Brady, 1994) fruit ripening. The biochemistry and physiology of a number of these wall-degrading enzymes, in relation to fruit ripening, have been reviewed (Fischer and Bennett, 1991; Tucker and Mitchell, 1993; Seymour and Gross, 1996). Cellulase, PE, and PG have been implicated in abscission, whereas the role of other enzymes has as yet not been evaluated.

**Cellulase:** An increase in activity has been reported to be associated with leaf abscission (Lewis and Varner, 1970), and with flower abscission in tobacco (Lieberman *et al.*, 1983), and tomato (Tucker *et al.*, 1984). Two isoforms of the enzyme were found, one with an isoelectric point (pI) of 4.5, the other of 9.5. Gene expression of the latter occurred prior to leaf abscission (Lewis and Varner, 1970; Tucker *et al.*, 1988; Tucker and Milligan, 1991) and prior to flower abscission in soybean (Kemmerer and Tucker, 1994). Evidence for a role of this enzyme in leaf abscission followed from the work of Sexton *et al.* (1981) who introduced an antibody to this protein in the abscission layer and found that abscission was prevented. Immunoblotting showed that the pI 9.5 enzyme of bean leaf abscission zone was present in the abscission zone of soybean flowers (Kemmerer and Tucker, 1994). In bean leaves the pI 9.5 isoform was also present in the stele next to the abscission zone (del Campillo *et al.*, 1990). Its presence a few millimetres from the zone probably relates to tylose formation, which often occurs in the xylem adjacent to the abscission zone (Klein, 1923; Chattaway, 1948). Degradation of the pit membrane, which mainly consists of cellulose, is required for tylose formation.

In tomato pedicels two genes coding for endo-1,4- $\beta$ -D-glucanase were found, one being highly expressed both within the abscission zone and distal to the zone, and another mainly confined to the abscission zone. It is not clear how these transcripts relate to the pI 9.5 enzyme in soybean pedicels (Lashbrook *et al.*, 1994). Subsequently, four additional transcripts were isolated from tomato pedicels, two being homologous to fruit pericarp tissue and two were novel genes whose expression was correlated with flower shedding. The mRNA of two of the six cellulase genes isolated from the pedicel was reduced to 1% when the pedicel was treated with indole-3-acetic acid, which resulted in virtually no abscission. Another cellulase

gene, in contrast, increased slightly following this auxin treatment, indicating that repression of specific cellulase genes is also integral to the abscission process (del Campillo and Bennett, 1996).

Tucker *et al.* (1984) assessed the possible role of endo-1,4- $\beta$ -D-glucanase in abscission, using two tomato mutants in which fruit ripening is delayed or does not occur, called *rin* (ripening inhibitor) and *Nr* (never ripe), respectively. In *rin* plants, flower abscission was as in controls, but the mutant showed a delayed increase in enzyme activity, and lower peak activity. In the *Nr* mutant, now known to be a mutation in the ethylene receptor, similar to *etr1* in *Arabidopsis* (Lanahan *et al.*, 1994), the increase of enzyme activity was more delayed than in *rin*, and peak activity was much lower than in *rin*, which correlates with a delay in flower abscission. These data indicate that endo-1,4- $\beta$ -D-glucanase activity is essential in flower abscission. Similar studies have not been reported with regard to the fall of floral parts.

**Pectinesterase and polygalacturonase:** In tobacco flower abscission zones, no change was found in PE activity (Moline *et al.*, 1972), but PG activity increased (Tucker *et al.*, 1984). A gene for PG has been isolated from tomato flower pedicel abscission zones, which was regulated in co-ordination with flower abscission (Kalaitzis *et al.*, 1995). In the *rin* tomato mutant, PG activity in the flower abscission zone increased as in the wild type (and flower abscission was also unaltered), whilst in the *Nr* mutant, both the increase in PG activity and the onset of abscission were delayed with respect to wild type (Tucker *et al.*, 1984). This close correlation does suggest that PG may be involved in cell wall separation in flowers.

**Peroxidase:** A good temporal correlation was found between abscission zone weakening in *Phaseolus* pedicels and increased peroxidase activity (Henry and Jensen, 1973; Henry *et al.*, 1974). Increased activity was apparently mainly due to *de novo* synthesis, as cycloheximide treatment prevented it (Valdovinos and Jensen, 1973; Valdovinos *et al.*, 1985). The precise role of peroxidase in the zone is as yet not clear (Henry, 1979). One function of peroxidase is polymerization of lignin monomers, and this may well be the reason for the considerable increase in peroxidase activity because at the proximal side of the separation zone, cell walls become heavily impregnated with both lignin and suberin, and tylose formation must also involve synthesis of these compounds.

**Role of  $Ca^{2+}$  and pH changes:** Osborne (1989) noted that  $Ca^{2+}$  was lost from walls of leaf abscission zone cells, and that the affinity for added calcium ions decreased as abscission progressed. At the same time, abscission could be blocked by applying a high dose of calcium ions. The role of added calcium is, however, not unequivocal as calcium may have several effects on the physiology of



abscission zone cells. Kubart (1906) and Kendall (1918) found an acid reaction from the abscised corolla base in *Nicotiana*, and Kendall (1918) noted increased acidification in the base of *Datura* corollas at abscission. Osborne (1989) drew attention to the possibility that cell wall loosening may simply occur as a result of wall acidification. A drop in pH may release calcium ions from the walls. However, the low pH of separation zones may also be due to the presence of free pectic acid and, therefore, be a result, rather than a cause, of separation processes. Kendall (1918) also noted that in *Nicotiana* an acid reaction of the abscission zone can sometimes be found in controls, considerably prior to abscission, and that no acidity was detected in abscised *Nicotiana* pedicels. The role of free calcium and changes of acidity in the cell walls, therefore, is as yet unclear.

#### Hormonal control: ethylene

**Inflorescences and flowers:** The role of ethylene in abscission is well established. Exposure of plants to exogenous ethylene hastened inflorescence abscission in plants such as olive (Weis *et al.*, 1988), *Beloperone* and *Pachystachus* (Woltering, 1987), and flower fall in several other species (Cameron and Reid, 1981; Hoyer, 1985a, b; van Leeuwen, 1985; Rewinkel-Jansen, 1985).

The rate of ethylene production often increases prior to flower abscission, for example in the male flower of *Echallium elaterum* (Jackson *et al.*, 1972), and in flowers of tomato (Roberts *et al.*, 1984) and *Lathyrus odoratus* (Mor *et al.*, 1984b). Silver thiosulphate (STS), an inhibitor of ethylene action, reduced flower abscission to zero in several species (Cameron and Reid, 1981; Mor *et al.*, 1984a, b; van Leeuwen, 1985; Hoyer, 1985a, b; Joyce, 1989; Sexton *et al.*, 1995). Amino-oxyacetic acid (AOA), which inhibits ethylene synthesis, also delayed the onset of flower abscission (Furutani *et al.*, 1989; Dostal *et al.*, 1991). Recently, some cyclic olefins have been found to inhibit ethylene action; one of these (diazocyclopentadiene, DACP) inhibited flower abscission in sweet pea (Sexton *et al.*, 1995), and another (1-methylcyclopropene, MCP) had the same effect on flower abscission in Geraldton wax flower (Serek *et al.*, 1995). The effects of these inhibitors strongly indicate that the natural abscission of flowers is controlled by endogenous ethylene.

Darkness or shade often increases flower fall (Jiang and Egli, 1993). In *Begonia* and *Hibiscus* plants, the effect of darkness was alleviated by STS, indicating mediation of the effect through endogenous ethylene (Hoyer, 1985a, b). Wien *et al.* (1989) observed increased ethylene production in *Capsicum annuum* flowers, in plants placed in 80% shade. Various other environmental factors, such as elevated temperatures (*Phaseolus vulgaris*, Monterroso and Wien, 1990; Konsens *et al.*, 1991; *C. annuum*, Rylski and Sigelman, 1982; Wien 1990), and low soil water potential

(Cochran, 1936) are also known to stimulate flower abscission. Ethylene production in plants is generally increased by these factors (Abeles *et al.*, 1992). High temperature-induced flower abscission in *C. annuum* was inhibited by STS (Aloni *et al.*, 1995).

**Petals and sepals:** Fitting (1911) exposed flowers of numerous *Geranium* species and other members of the Geraniaceae (*Erodium*, *Pelargonium*) to illuminating gas and tobacco smoke and found that this resulted in rapid petal abscission. The effect of illuminating gas is now known to be due to ethylene. The response time to the treatment decreased with the age of the flowers. Rapid response times were later also found in *Pelargonium* hybrids (Deneke *et al.*, 1990; Evensen, 1991; Evensen *et al.*, 1993b).

The rate of ethylene production increased prior to petal abscission in *Digitalis* (Stead and Moore, 1983), banana (*Musa* sp.; Israeli and Blumenfeld, 1980), and *Rubus* (Burdon and Sexton, 1993). In two rose cultivars, one abscising its petals several days earlier than the other, a peak in ethylene production (by flowers) preceded abscission by about 2 d (Mayak *et al.*, 1972). Some experiments also showed increased ethylene production in *Pelargonium* (Wallner *et al.*, 1979; Deneke *et al.*, 1990), although this was not always confirmed (Armitage *et al.*, 1980).

STS reduced or prevented petal abscission in numerous species (Rewinkel-Jansen, 1985; Agnew *et al.*, 1985; Woltering and van Doorn, 1988; McKenzie and Lovell, 1992b). Aminoethoxyvinylglycine (AVG), an inhibitor of ethylene synthesis, was reported to prevent petal shattering in potted *Pelargonium* × hortorum (Miranda and Carlson, 1982), *Anthirrinum* (Wang *et al.*, 1977), *Digitalis* (Stead, 1985), and raspberry (*Rubus idaeus*; Burdon and Sexton, 1993).

**Styles and stamens:** Style abscission in lemon flowers was delayed after a spray with AVG (Sipes and Einset, 1982), indicating that abscission of this floral part, too, is regulated by endogenous ethylene.

#### Hormonal control: auxins

As leaf abscission is generally increased by removal of the distal leaf part, an effect alleviated by applying auxin at the cut end, it has been hypothesized that normal continuous auxin production by the distal leaf part prevents abscission (Osborne, 1989). A similar mechanism may occur in inflorescences, flowers and flower parts.

**Inflorescences:** Female catkins of *Alnus japonica* do not normally abscise, but when they were cut off at the upper end of the stalk, the remaining stalks were shed, indicating that fall is normally prevented by the presence of the distal parts (Namikawa, 1926), a situation reminiscent of the effect of the distal parts in leaf abscission. The fall of male catkins in *Alnus glutinosa* and *Corylus avellana* was

delayed by spraying with an aqueous solution of the synthetic auxin  $\alpha$ -naphthaleneacetic acid (NAA), or by placing cut branches in aqueous solution of NAA or indole-3-acetic acid (IAA). In some experiments with cut branches placed in water the catkins did not abscise and remained turgid for 3 months following this treatment (Aarts, 1957). Inflorescence abscission in olives was also reduced by auxin (2,4-dichloroacetic acid) treatment (Addicott and Lynch, 1955).

**Flowers:** Auxins may also be involved in flower drop. Flower removal in tomato (Roberts *et al.*, 1984) and pepper (*Capsicum annuum*; Wien and Zhang, 1991) resulted in rapid pedicel abscission, but application of NAA on the cut surface alleviated this effect, at least in pepper. Seasonal fluctuations in the abscission of cotton flowers (Chatterjee and Chatterjee, 1971) and *Begonia davissii* flower buds (Hänisch ten Cate *et al.*, 1975) were correlated with the level of extractable IAA in abscission zones.

Drop of unfertilized flowers may relate to low endogenous auxin production in the ovary. Yager and Muir (1958) showed that ovary auxin production in unpollinated tobacco flowers was low compared to production in pollinated flowers. Floral abscission in *Cleome hassleriana* was found to be partially controlled by the presence of anthers, which apparently had this effect by virtue of their continued production of auxin (Koevenig, 1973).

Several reports show that exogenously applied auxins can prevent or delay flower abscission, for example, in *Lupinus* sp. (Warne, 1947; Aarts, 1957), apple (Osborne and Wain, 1951; van Overbeek, 1952), *Begonia*, dogwood (*Cornus florida*), cherry, *Phaseolus* (Addicott and Lynch, 1955), cotton (Chatterjee, 1977), and Geraldton wax flowers (*Chamelaucium uncinatum*; Joyce, 1989). Spraying with auxins is, however, not always successful (Burkholder and McCown, 1941; Wien and Zhang, 1991; Struckmeyer and Roberts, 1950). At certain concentrations auxin may increase rather than decrease abscission, but it is well established that excess auxin stimulates ethylene production (Abeles *et al.*, 1992). Furthermore, in experiments in which auxins were used as foliar sprays a surfactant was usually included in the spray solutions. Many surfactants are toxic to plants and can stimulate ethylene synthesis (Lownds and Bukovac, 1989; Knoche and Noga, 1991; van Doorn *et al.*, 1993).

IAA reduced pedicel abscission in soybean flowers, an effect which could not be overcome with a treatment with ethephon, an ethylene releasing compound (Oberholster *et al.*, 1991). Treatment with auxin reduced abscission in rose pedicels, furthermore it reversed the enhanced abscission observed after placing stems in a solution of 1-aminocyclopropane-1-carboxylic acid (ACC) (Goszczyńska and Zieslin, 1993). Both these results indicate that auxin is strongly able to decrease the sensitivity of abscission zone cells to ethylene.

Application of 2,3,5-triiodobenzoic acid (TIBA), an inhibitor of auxin transport, on the pedicel of pepper flowers hastened pedicel abscission (Wien *et al.*, 1992). This results may indicate that auxin is indeed an endogenous regulator of pedicel abscission.

**Petals:** Little is known about auxin effects in petal abscission. Armitage *et al.* (1980) noted that auxin did not delay petal abscission in *Pelargonium* × hortorum, and McKenzie and Lovell (1992b) found hastening of petal abscission by auxin in *Crocodymia*. In contrast, auxin in lanolin paste, placed on the adaxial surface of *Linum lewisii* petals, delayed the onset of petal abscission by about 5 h (Addicott, 1977). When the distal petal half was trimmed off and auxin in lanolin paste was placed on the edges, abscission was also delayed. In these experiments, the lanolin-treated petals, however, showed earlier, and more rapid, abscission than untreated control petals, an effect thought to be due to flower manipulation. The results of Addicott (1977) are therefore inconclusive.

**Styles and stamens:** Stylar abscission has been inhibited by auxin treatment: in cherry, plum, *Lilium*, *Oenothera*, and *Petunia* (Addicott and Lynch, 1955), and *Citrus* species (Einset *et al.*, 1979). The anthers in *Cleome hassleriana* were found to delay filament abscission, apparently through their supply of auxin (Koevenig, 1973; Koevenig and Sillix, 1973). Abscission of these floral parts may, therefore, also be regulated by endogenous auxins.

#### Hormones other than auxin and ethylene

**Inflorescences and flowers:** The possible regulating effect of other hormones is as yet unclear. Application of gibberellin on the pedicel of cotton flowers after severing the flower hastened pedicel abscission (Chatterjee, 1977). In *Begonia*, in contrast, gibberellic acid had no effect on flower abscission, and cytokinins did not have an effect either (Hänisch ten Cate and Bruinsma, 1973). Flower fall of *Capsicum annuum* could nevertheless be completely overcome by a combination of gibberellic acid and a cytokinin (Wien and Zhang, 1991).

The level of free ABA in the abscission zone of *Hibiscus* (Swanson *et al.*, 1975) and *Lupinus luteus* (Porter, 1977) flowers increased prior to abscission. Treatment of *Vitis vinifera* flowers with abscisic acid (ABA) resulted in early abscission (Weaver and Pool, 1969), and an application of ABA on the pedicel of cotton flowers, after flower removal, also promoted pedicel abscission (Chatterjee, 1977). In contrast, application of ABA had no effect on flower fall in *Begonia* (Hänisch ten Cate and Bruinsma, 1973) or *Lupinus luteus* (Porter, 1977). When exogenous ABA increased abscission in leaves it also generally increased the rate of ethylene production (Jackson and

Osborne, 1970; Abeles *et al.*, 1992), thus any effect may be indirect.

**Petals:** Petal abscission in *Pelargonium* × hortorum was inhibited by a spray with an aqueous mixture of gibberellins A4 and A7 (Miranda and Carlson, 1982). In *Leptospermum scoparium* (Zieslin and Gottesman, 1983) and in Golden Wave roses (Mayak and Halevy, 1970) petal abscission was delayed after treatment with a cytokinin; in *Leptospermum* this was related to a decrease in ethylene production (Zieslin and Gottesman, 1983). Intact plants of Golden Wave roses shed their petals earlier than Lovita roses, and the level of extractable cytokinins in the former was lower (Mayak and Halevy, 1970).

ABA concentrations in petals of cut roses increased prior to abscission, this rise also occurred earlier in a cultivar showing early abscission than in one with late abscission (Mayak *et al.*, 1972). In Shamouti orange (*Citrus sinensis*) a small increase in ABA concentration was found in the petals prior to their abscission (Goldschmidt, 1980). Addicott (1977) applied ABA in lanolin paste to the adaxial surface of *Linum lewisii* petals and found little effect of ABA, as compared to the pronounced enhancement of abscission by lanolin paste alone. Similarly, ABA application had no effect on petal abscission in *Crococmia* (McKenzie and Lovell, 1992b).

**Styles:** Although a large increase was found in the endogenous concentration of ABA in styles of *Citrus limon* prior to abscission (Goldschmidt, 1980), style abscission in this species was not affected by ABA treatment (Einset *et al.*, 1979).

#### Phytochrome

Preliminary results from experiments in which soybean plants were locally shaded or treated with white or red light indicated that red light affected flower abscission (Heindl and Brun, 1983). More detailed experiments showed that about 80% of the flower buds of *Hibiscus rosa-sinensis* abscised when plants were held in darkness for several days (Force *et al.*, 1988; van Lieburg *et al.*, 1990). Dark-induced abscission of flower buds was much reduced by treatment with red light of low photon fluence, and the effect of red light was reversed by far red light, clearly implicating phytochrome as a regulator of dark-induced abscission (van Lieburg *et al.*, 1990). In other systems red light has often been reported to reduce the rate of ethylene production (Goeschl *et al.*, 1967; Samimy, 1978).

#### Use of mutants and transgenic plants

The abscission zone often consists of only a few layers of cells, and the actual abscission occurs between the cell

walls of only two layers of cells. Physiological studies should, ideally, distinguish between the enzymatic activities in the separating cells and their walls on one hand, and other changes occurring close to this cell layer, such as in the deposition of material involved in prevention of pathogen invasion (including tylose formation). Thus far, the biochemical approach has not always led to a clear distinction between these two processes, mainly because of the problems with accurately separating the various cell layers and the paucity of material. Molecular methods seem now sensitive enough to distinguish between these type of cells.

Two mutants have been important in the evaluation of ethylene perception in abscission (Patterson *et al.*, 1994; Lanahan *et al.*, 1994). Both are point mutations in the membrane spanning parts of the ethylene receptor (Blecker and Schaller, 1996), one, *etr1-1* in *Arabidopsis* (cysteine<sup>65</sup> replaced by tyrosine), was produced using chemical mutagenesis (Blecker *et al.*, 1988), whereas the other, *Nr* in tomato (isoleucine<sup>69</sup> replaced by phenylalanine) was found growing in the field (Rick, 1956). The *Nr* mutant shows a delay in flower abscission with respect to the wildtype and was found to have reduced PG and cellulase activity (Tucker *et al.*, 1984), indicating that the increase in activity of both enzymes is regulated by ethylene. Ethylene is also crucial to the abscission of petals, sepals, and stamens, at least in *Arabidopsis*, as in the *etr1-1* mutant the shedding of these parts is delayed. In the wildtype both petals and sepals abscised when still fully turgid, whilst in the mutant these organs fell after they had become wilted (Patterson *et al.*, 1994), which may relate to growth of the subtending parts, hence may not be true abscission.

The production of mutants or transgenic plants may be an important tool in the study of the physiology of cell wall separation, as it has been in fruits. Transgenic plants with over-expressed or repressed activity of enzymes such as PG (Smith *et al.*, 1988; Giovannoni *et al.*, 1989), PE (Tieman *et al.*, 1992; Hall *et al.*, 1993), cellulase (Lashbrook, personal communication, 1996) and peroxidase (Lagrimini *et al.*, 1990) have been constructed. Similar constructs could be used for investigations on the role of these enzymes in abscission processes. Transgenic plants thus far showed the absence of a role of various enzymes such as PG, PE, and cellulase, when studied in isolation, on fruit softening in tomato, although some of these enzymes seem involved in the last stages of fruit degradation. Although this is at present unknown, these last stages may bear more relationship with cell wall dissolution during abscission than the early stages of fruit softening. Moreover, when an enzyme by itself seems not essential for abscission, cell wall separation can be due to the concerted action of several enzymes, hence constructs with a blocked activity of combinations of enzymes are just as important as studies on individual enzymes.

Delayed abscission of flowers, petals and styles have been reported in the tomato *Nr* mutant (Tucker *et al.*, 1984; Lanahan *et al.*, 1994) and in tomato ACC antisense plants (Atkinson, personal communication, 1996), but since similar delays have not been reported in plants that were transgenic for cell wall PE and PG it may be concluded that the effects on abscission were not obvious. At least in the PE antisense plants reported by Hall *et al.* (1993) no clear changes in flower, petal and style abscission have been noted (Bird, personal communication, 1996). Similarly, transgenic tomato plants with an antisense construct for a  $\beta$ -galactosidase having exo-1,4-galactanase activity showed clearly reduced enzyme activity in the fruits, but no obvious changes were observed in the abscission of flowers, petals, and styles (Verhoeven, personal communication, 1996). The absence of effects on abscission may be due to a different isozyme profile in fruits and abscission zones. In the antisense plants used by Hall *et al.* (1993), for example, the activity of PE in the leaves remained unaffected, whereas that of fruits was reduced by 93%. The cauliflower mosaic virus 35S promoter was expressed in the leaves, hence it was suggested that the leaf PE isozyme profile is different from that in the fruits. Similarly, PE and PG isozymes in the fruits may be different from those in the abscission zones, and antisense plants constructed for the study of abscission must be based on the sequences of the isozymes found in the zones. Absence of effects on abscission in transgenic plants may also be related to the specificity of promoters. Giovannoni *et al.* (1989), for example, expressed PG against a mutant background in which PG is not expressed, using a fruit-ripening specific promoter. In several antisense constructs the 35S promoter was used (PG: Smith *et al.*, 1988; PE: Tieman *et al.*, 1992; Hall *et al.*, 1993). Although it is often assumed that 35S is a constitutive promoter, it is not always expressed; thus it remains to be evaluated whether it will be expressed in the abscission zones. If this is not the case, a search for abscission zone specific promoters has to precede experimentation with transgenic plants.

The role of hormones can also be studied using transgenic plants. In tomato, an ACC antisense construct was found to delay abscission of both petals and stamens, clearly indicating a role of ethylene synthesis in the shedding of these parts (Atkinson, personal communication, 1996). The role of auxins and cytokinins can be studied using constructs that result in over-expression of these hormones (Hamill, 1993). Auxin over-expression often results in increased ethylene production, but a combination of auxin over-expression and genes conferring ethylene insensitivity can separate the effects of auxin and ethylene (Romano *et al.*, 1993). The *ipt* (isopentenyl transferase) gene, which catalyses the rate-limiting step in cytokinin synthesis, is widely used for cytokinin over-expression (Gan and Amasino, 1995). In tomato, such

an *ipt* transgenic plant had increased endogenous zeatin riboside levels (Groot *et al.*, 1995), but no differences were found in petal and style abscission (van Doorn and Groot, unpublished results), indicating no major role of cytokinins in the abscission process.

## Conclusions

The fall of inflorescences, flowers, and flower parts is usually due to cell wall dissolution. However, shedding of petals, stamens, and styles may, in some species, occur solely owing to the forces generated by the growing fruit, not to cell wall dissolution. This may occur particularly following wilting or desiccation, but Reiche (1885) even claimed that the fall of turgid petals was, in several species, only due to fruit growth, an observation that warrants reevaluation.

The anatomical evidence shows that abscission zones are generally formed during organ growth, not after an environmental stimulus. Without exception, the ultrastructural data on abscission of inflorescences, flowers, and flower parts indicate high protein synthesis and high secretory activity of material toward cell walls of abscission zone cells, indicating the release of enzymes involved in cell wall separation. Both the anatomical and physiological data indicate that flower abscission is the result of active middle lamella solubilization; and in some species also of breakdown of the primary wall.

The physiological evidence indicates that both endopolygalacturonase and cellulase are involved in cell wall separation, whilst the role of a range of other enzymes that may be involved in cell wall degradation during fruit ripening, such as PE and galactosidases, in cell wall separation during abscission is as yet unclear. Experiments with mutants and antisense constructs, or other constructs in which the function of one or more enzymes is blocked, may shed more light on cell wall separation, but requires information on the sequence of the isoenzymes present in the abscission zone and, possibly, the use of abscission zone specific promoters.

The hormonal physiology of abscission indicates a role of both auxins and ethylene. Hormonal relations in flower abscission has been studied only in a few species. This limitation may also be advantageous as at least in these species (bean, tobacco and tomato) the results can be interrelated. Flower abscission is advanced by ethylene. A decrease in endogenous auxins, for example, when the flower remains unfertilized, may be a trigger of abscission, owing to an increase in ethylene sensitivity. Petal abscission is also clearly regulated by ethylene, but a role of auxin is as yet unclear. The available evidence, although scarce, also indicates that style and stamen abscission is controlled by endogenous auxin, whilst in styles at least ethylene is apparently involved. The hormonal control of sepal abscission has apparently not been investigated, but

may be similar to that in leaves, where at least both auxin and ethylene are involved.

As the initial results are promising, many of the physiological questions relating to the processes occurring in the cells and the cell walls involved in the separation process, as distinct from the processes relating to defence against microbial intrusion, may become solved by the production of mutants and transgenic plants.

## Acknowledgements

The authors are grateful to Ernst Woltering and Johan Bruinsma for critically reading of the manuscript.

## References

- Aarts JFT. 1957. The development and keepability of cut flowers. *Mededelingen Directeur van de Tuinbouw* **20**, 690–701 (in Dutch).
- Abeles FB, Morgan PW, Saltveit ME. 1992. *Ethylene in plant biology*, 2nd edn. San Diego: Academic Press, 414pp.
- Abernathy RH, Palmer RG, Shibles R, Anderson IC. 1977. Histological observations on abscising and retaining soybean flowers. *Canadian Journal of Plant Science* **57**, 713–16.
- Addicott FT. 1977. Flower behavior in *Linum lewisii*: some ecological and physiological factors in opening and abscission of petals. *American Midland Naturalist* **97**, 321–32.
- Addicott FT. 1982. *Abscission*. Berkeley: University of California Press.
- Addicott FT, Lynch RS. 1955. Physiology of abscission. *Annual Reviews of Plant Physiology* **6**, 211–38.
- Agnew NH, Albrecht ML, Kimmins RK. 1985. Reducing corolla abscission of *Streptocarpus × hybridus* under simulated shipping conditions with silver thiosulfate. *HortScience* **20**, 118–19.
- Aloni B, Karni L, Ryłski I. 1995. Inhibition of heat-induced pepper (*Capsicum annuum*) flower abscission and induction of fruit malformation by silver thiosulphate. *Journal of Horticultural Science* **70**, 215–20.
- Aloni B, Karni L, Zaidman Z, Schaffer AA. 1996. Changes of carbohydrates in pepper (*Capsicum annuum* L.) flowers in relation to their abscission under different shading regimes. *Annals of Botany* **78**, 163–8.
- Apelbaum A, Yang SF. 1981. Biosynthesis of stress ethylene induced by water deficit. *Plant Physiology* **68**, 594–6.
- Armitage AM, Heins R, Dean S, Carlson W. 1980. Factors influencing flower petal abscission in the seed-propagated *Geranium*. *Journal of the American Society for Horticultural Science* **105**, 662–4.
- Aufhhammer W, Götz I, Peter M. 1987. Yield performance in field bean (*Vicia faba* L.) in relation to interactions between inflorescences at different nodes. *Journal of Agricultural Science* **108**, 479–86.
- Becquerel P. 1907. Sur un cas remarquable d'autonomie de pedoncule floral du tabac, provoquée par le traumatisme de la corolle. *Comptes Rendus de l'Académie des Sciences, Paris* **145**, 936–7.
- Bleecker AB, Estelle MA, Somerville CH, Kende H. 1988. Insensitivity to ethylene conferred by a dominant mutation in *Arabidopsis thaliana*. *Science* **241**, 1086–9.
- Bleecker AB, Schaller GE. 1996. The mechanism of ethylene perception. *Plant Physiology* **111**, 653–60.
- Bonghi ZC, Casadoro G, Ramina A, Rascio N. 1993. Abscission in leaf and fruit explants of *Prunus persica* (L.) Batsch. *New Phytologist* **123**, 555–65.
- Bornman CH, Spurr AR, Addicott FT. 1967. Abscisin, auxin, and gibberellin effects on the developmental aspects of abscission in cotton (*Gossypium hirsutum*). *American Journal of Botany* **54**, 125–35.
- Brown HS, Addicott FT. 1950. The anatomy of experimental leaflet abscission in *Phaseolus vulgaris*. *American Journal of Botany* **37**, 650–6.
- Burdon JN, Sexton R. 1993. Ethylene co-ordinates petal abscission in red raspberry (*Rubus idaeus* L.) flowers. *Annals of Botany* **72**, 289–94.
- Burkholder CL, McCown M. 1941. Effect of scoring and of alpha-naphthyl acetic acid and amide spray upon fruit set and of the spray on pre-harvest fruit drop. *Proceedings of the American Society for Horticultural Science* **38**, 117–20.
- Cameron AC, Reid MS. 1981. The use of silver thiosulfate anionic complex as a foliar spray to prevent flower abscission in zygotactis. *HortScience* **16**, 761–2.
- Cameron AC, Reid MS. 1983. Use of silver thiosulfate to prevent flower abscission from potted plants. *Scientia Horticulturae* **19**, 373–8.
- Carey AT, Holt K, Picard S, Wilde R, Tucker GA, Bird CR, Schuch W, Seymour GB. 1995. Tomato exo-(1–4)- $\beta$ -D-galactanase. Isolation, changes during ripening in normal and mutant fruit, and characterization of a related cDNA clone. *Plant Physiology* **108**, 1099–1107.
- Carrington CMS, Pressey R. 1996.  $\beta$ -Galactosidase II activity in relation to changes in cell wall galactosyl composition during tomato ripening. *Journal of the American Society of Horticultural Science* **121**, 132–6.
- Catlin PB, Olson EA. 1990. Pistillate flower abscission of walnut—'Serr', 'Sunland', 'Howard', and 'Chandler'. *HortScience* **25**, 1391–2.
- Catlin PB, Ramos DE, Sibbett GS, Olson WH, Olson EA. 1987. Pistillate flower abscission of the Persian walnut. *HortScience* **22**, 201–5.
- Chapman GP, Fagg CW, Peat WE. 1979. Parthenocarpy and internal competition in *Vicia faba* (L.). *Zeitschrift für Pflanzenphysiologie* **94**, 247–55.
- Chattaway MM. 1948. The development of tyloses and secretion of gum in heartwood formation. *Australian Journal of Science. Series B. Biological Science* **2**, 227–40.
- Chatterjee S. 1977. Studies on the abscission of flowers and fruits of cotton (*Gossypium barbadense* L.). *Biologia Plantarum* **19**, 81–7.
- Chatterjee S, Chatterjee SK. 1971. Analysis of the abscission process in cotton (*Gossypium barbadense* L.) leaves of different maturity. *Indian Journal of Experimental Biology* **9**, 485–8.
- Clifford PE, Pentland BS, Baylis AD. 1992. Effects of growth regulators on reproductive abscission in faba bean (*Vicia faba* cv. Troy). *Journal of Agricultural Science* **119**, 71–8.
- Cochran HL. 1936. Some factors influencing growth and fruit setting in the pepper (*Capsicum frutescens* L.). *Cornell Agricultural Experiment Station, Memoir* **190**.
- Crane JC, Iwakira BT, Lin TS. 1982. Effects of ethephon on shell dehiscence and flower bud abscission in pistachio. *HortScience* **17**, 383–4.
- Cronquist A. 1988. *The evolution and classification of flowering plants*, 2nd edn. New York: New York Botanical Garden.
- Darwin C. 1877. *The different forms of flowers on plants of the same species*. London: J. Murray.
- del Campillo E, Bennett AB. 1996. Pedicel break strength and cellulase gene expression during tomato flower abscission. *Plant Physiology* **111**, 813–20.

- del Campillo E, Reid PD, Sexton R, Lewis LN. 1990. Occurrence and localization of 9.5 cellulase in abscising and non-abscising tissues. *The Plant Cell* **2**, 245–54.
- Deneke CF, Evensen KB, Craig R. 1990. Regulation of petal abscission in *Pelargonium* × domesticum. *HortScience* **25**, 937–40.
- Deng X, Weinbaum SA, DeJong TM, Muraoka TT. 1991. Pistillate flower abortion in 'Serr' walnut associated with reduced carbohydrate and nitrogen concentrations in wood and xylem sap. *Journal of the American Society for Horticultural Science* **116**, 291–6.
- Dole J. 1990. Role of corolla abscission in delayed self-pollination of *Mimulus guttatus* (Scrophulariaceae). *American Journal of Botany* **77**, 1505–7.
- Dostal DL, Agnew NH, Gladon RJ, Weigle JL. 1991. Ethylene, stimulated shipping, STS, and AOA affect corolla abscission of New Guinea Impatiens. *HortScience* **26**, 47–9.
- Downs CG, Brady CJ, Gooley A. 1992. Exopolygalacturonase protein accumulates late in peach fruit ripening. *Physiologia Plantarum* **85**, 133–40.
- Einset JW, Cheng A, Elhag H. 1979. Citrus tissue culture: regulation of stylar abscission in excised pistils. *Canadian Journal of Botany* **58**, 1257–61.
- Endress PK. 1994. Diversity and Evolutionary biology of tropical flowers. Cambridge University Press.
- Evensen KB. 1991. Ethylene responsiveness changes in *Pelargonium* × domesticum florets. *Physiologia Plantarum* **82**, 409–12.
- Evensen KB, Clark DG, Singh A. 1993a. Rapid ethylene-induced gene expression during petal abscission. In: Pech JC, Latché A, Balagué C, eds. *Cellular and molecular aspects of the plant hormone ethylene*. Dordrecht: Kluwer, 278–83.
- Evensen KB, Page AM, Stead AD. 1993b. Anatomy of ethylene-induced petal abscission in *Pelargonium* × hortorum. *Annals of Botany* **71**, 559–66.
- Fischer CW. 1949. Snapdragons and calceolarias gas themselves. *New York Flower Grower Bulletin* **52**, 5–8.
- Fischer RL, Bennett AB. 1991. Role of cell wall hydrolases in fruit ripening. *Annual Review of Plant Physiology and Plant Molecular Biology* **42**: 675–703.
- Fitting H. 1911. Untersuchungen über die vorzeitige Entblätterung von Blüten. *Jahrbücher für wissenschaftliche Botanik* **49**, 187–263.
- Fitting H. 1921. Das Verblühen der Blüten. *Die Naturwissenschaften* **9**, 1–9.
- Force AR, Lawton KA, Woodson WR. 1988. Dark-induced abscission of *Hibiscus* flower buds. *HortScience* **23**, 592–3.
- Furutani SC, Johnston E, Nagao M. 1989. Anthesis and abscission of blue jade vine flowers treated with ethephon and AOA. *HortScience* **24**, 1042.
- Gan S, Amasino RM. 1995. Inhibition of leaf senescence by autoregulated production of cytokinin. *Science* **270**, 1986–8.
- Gärtner CF. 1844. Beiträge zur Kenntniss der Befruchtung der vollkommeneren Gewächse. I. Theil. Stuttgart: E. Schweizerbart Verlag.
- Gates P, Yarwood JN, Harris N, Smith ML, Boulter E. 1981. Cellular changes in the pedicel and peduncle during flower abscission in *Vicia faba*. In: Thompson R, ed. *Vicia faba: physiology and breeding*. The Hague: Martinus Nijhoff, 299–316.
- Gilliland MG, Bornman CH, Addicott FT. 1976. Ultrastructure and acid phosphatase in pedicel abscission of *Hibiscus*. *American Journal of Botany* **63**, 925–35.
- Giovannoni JJ, DellaPenna D, Bennett AB, Fischer RL. 1989. Expression of a chimeric polygalacturonase gene in transgenic rin (ripening inhibitor) tomato fruit results in polyuronide degradation but not fruit softening. *The Plant Cell* **1**, 53–63.
- Goeschl JD, Pratt HK, Bonner BA. 1967. An effect of light on the production of ethylene and the growth of the plumular portion of etiolated pea seedlings. *Plant Physiology* **42**, 1077–80.
- Goldschmidt EE. 1980. Abscisic acid in citrus flower organs as related to flower development and function. *Plant and Cell Physiology* **21**, 193–5.
- Goszczyńska D, Zieslin N. 1993. Abscission of flower peduncles in rose (*Rosa* × *hybrida*) plants and evolution of ethylene. *Journal of Plant Physiology* **142**, 214–17.
- Groot SPC, Bouwer R, Busscher M, Lindhout P, Dons HJ. 1995. Increase of endogenous zeatin riboside by introduction of the *ipt* gene in wild type and the *lateral suppressor* mutant of tomato. *Plant Growth Regulation* **16**, 27–36.
- Hall LN, Tucker GA, Smith CJS, Watson CF, Seymour GB, Bundick Y, Boniwell JM, Fletcher JD, Ray JA, Schuch W, Bird CR, Grierson D. 1993. Antisense inhibition of pectin esterase gene expression in transgenic tomatoes. *The Plant Journal* **3**, 121–9.
- Hamill JD. 1993. Alterations in auxin and cytokinin metabolism of higher plants due to expression of specific genes from pathogenic bacteria: a review. *Australian Journal of Plant Physiology* **20**, 405–23.
- Hänisch ten Cate CH, Berghoef J, van der Hoorn AMH, Bruinsma J. 1975. Hormonal regulation of pedicel abscission in *Begonia* flower buds. *Physiologia Plantarum* **33**, 280–4.
- Hänisch ten Cate CH, Bruinsma J. 1973. Abscission of flower bud pedicels in *Begonia*. I. Effect of plant growth regulating substances on the abscission with intact plants and with explants. *Acta Botanica Neerlandica* **22**, 666–74.
- Hänisch ten Cate CH, van der Ploeg-Voogd JJJ, Bruinsma J. 1973. Abscission of flower bud pedicels in *Begonia*. III. Anatomical pattern of abscission. *Acta Botanica Neerlandica* **22**, 681–5.
- Hannig E. 1913. Untersuchungen über das Abstossen von Blüten unter dem Einfluss äusserer Bedingungen. *Zeitschrift für Botanik* **5**, 417–69.
- Heindl JC, Brun WA. 1983. Light and shade effects on abscission and <sup>14</sup>C photoassimilate partitioning among reproductive structures in soybean. *Plant Physiology* **73**, 434–9.
- Henry EW. 1979. Peroxidase in tobacco abscission zone tissue. VII. Ultraviolet absorption spectra of ethylene treated tobacco flower pedicel tissue. *Journal of Experimental Botany* **30**, 333–7.
- Henry EW, Jensen TE. 1973. Peroxidase in tobacco abscission zone tissues. I. Fine structural localization in cell walls during ethylene-induced abscission. *Journal of Cell Science* **13**, 736–50.
- Henry EW, Valdovinos JG, Jensen TE. 1974. Peroxidases in tobacco abscission zone tissue. II. Time-course of peroxidase activity during ethylene-induced abscission. *Plant Physiology* **54**, 192–6.
- Høyer L. 1982. The response of pot plants to ethylene and low light levels. *Saertryk af Gartner Tidende* **98**, 670–1 (in Danish).
- Høyer L. 1985a. Bud and flower drop in *Begonia elatior* 'Sirene' caused by ethylene and darkness. *Acta Horticulturae* **167**, 387–91.
- Høyer L. 1985b. Silver thiosulphate can to some extent prevent leaf, bud and flower drop in *Hibiscus rosa-sinensis* caused by ethylene and darkness. *Acta Horticulturae* **181**, 147–53.
- Huff A, Dybing CD. 1980. Factors affecting shedding of flowers of soybean (*Glycine max* (L.) Merrill). *Journal of Experimental Botany* **31**, 751–62.

- Israeli Y, Blumenfeld A. 1980. Ethylene production by banana flowers. *HortScience* **15**, 187–9.
- Jackson MB, Morrow IB, Osborne DJ. 1972. Abscission and dehiscence in the squirting cucumber, *Ecballium elaterium*. Regulation by ethylene. *Canadian Journal of Botany* **50**, 1465–71.
- Jackson MB, Osborne DJ. 1970. Ethylene, the natural regulator of leaf abscission. *Nature* **255**, 1019–22.
- Jensen TE, Valdovinos JG. 1967. Fine structure of abscission zones. I. Abscission zones of the pedicels of tobacco and tomato flowers at anthesis. *Planta* **77**, 298–318.
- Jensen TE, Valdovinos JG. 1968. Fine structure of abscission zones. III. Cytoplasmic changes in abscising pedicels of tobacco and tomato flowers. *Planta* **83**, 303–13.
- Jiang H, Egli DB. 1993. Shade induced changes in flower and pod number and flower and fruit abscission in soybean. *Agronomy Journal* **85**, 221–5.
- Joyce DC. 1989. Treatments to prevent flower abscission in Geraldton wax. *HortScience* **24**, 391.
- Kalaitzis P, Koehler SM, Tucker ML. 1995. Cloning of a tomato polygalacturonases expressed in abscission. *Plant Molecular Biology* **28**, 647–56.
- Kambal AE. 1969. Flower drop and fruit set in field beans, *Vicia faba*. *Journal of Agricultural Science* **72**, 131–8.
- Kaska N. 1989. Bud, flower and fruit drop in citrus and other fruit trees. In: Osborne DJ, Jackson MB, eds. *Cell separation in plants*. Berlin: Springer Verlag, 309–21.
- Kemmerer EC, Tucker ML. 1994. Comparative study of cellulases associated with adventitious root initiation, apical buds, and leaf, flower, and pod abscission zones in soybean. *Plant Physiology* **104**, 557–62.
- Kendall JM. 1918. Abscission of flowers and fruits in the Solanaceae, with special reference to *Nicotiana*. *California University Publications in Botany* **5**, 347–428.
- Klein G. 1923. Zur Ätiologie der Thyllen. *Zeitschrift für Botanik* **15**, 417–39.
- Knoche M, Noga GJ. 1991. Effect of non-ionic surfactants on ethylene release and leaf growth of *Phaseolus vulgaris* L. *Scientia Horticulturae* **46**, 1–11.
- Koenig JL. 1973. Floral development and stamen filament elongation in *Cleome hassleriana*. *American Journal of Botany* **60**, 122–9.
- Koenig JL, Sillix D. 1973. Movement of IAA in sections from spider flower (*Cleome hassleriana*) stamen filaments. *American Journal of Botany* **60**, 231–5.
- Konsens I, Ofir M, Kigel J. 1991. The effect of temperature on the production and abscission of flowers and pods in snap bean. *Annals of Botany* **67**, 391–9.
- Kubart B. 1906. Die organische Ablösung der Korolle nebst Bemerkungen über die Mohlse Trennungsschichte. Sitzungsberichte der kaiserlichen Akademie der Wissenschaften, Wien, mathematisch-naturwissenschaftliche Klasse, Abteilung I, **115**, 1491–1518.
- Lagrimini LM, Bradford S, Rothstein S. 1990. Peroxidase-induced wilting in transgenic tobacco plants. *The Plant Cell* **2**, 7–18.
- Lanahan MB, Yen H-C, Giovannoni JJ, Klee HJ. 1994. The *Never ripe* mutation blocks ethylene perception in tomato. *The Plant Cell* **6**, 521–30.
- Lashbrook CC, Gonzales-Bosch C, Bennett AB. 1994. Two divergent endo- $\beta$ -1,4-glucanase genes exhibit overlapping expression in ripening fruit and abscising flowers. *The Plant Cell* **6**, 1485–93.
- Lee E. 1911. The morphology of leaf fall. *Annals of Botany* **25**, 58–106.
- Lee TD. 1988. Patterns of fruit and seed production. In: Doust JL, Doust, LL, eds. *Plant reproductive ecology. Patterns and strategies*. New York: Oxford University Press, 179–202.
- Leinweber CL, Hall WC. 1959. Foliar abscission in cotton. III. Macroscopic and microscopic changes associated with natural and chemically induced leaf-fall. *Botanical Gazette* **121**, 9–11.
- Lewis LN, Varner JE. 1970. Synthesis of cellulase during abscission of *Phaseolus vulgaris* leaf explants. *Plant Physiology* **46**, 194–9.
- Lieberman SJ, Valdovinos JG, Jensen TE. 1983. A morphometric study on the effects of ethylene treatment in promoting abscission of tobacco flower pedicels. *Plant Physiology* **72**, 583–85.
- Lownds NK, Bukovac MJ. 1989. Surfactant-induced ethylene production by leaf tissues. *Journal of the American Society of Horticultural Science* **114**, 449–54.
- Machlachlan G, Brady CJ. 1994. Endo-1,4- $\beta$ -D-glucanase, xyloglucanase, and xyloglucan endo-transglycosylase activities versus potential substrates in ripening tomatoes. *Plant Physiology* **105**, 965–74.
- Mayak S, Halevy AH. 1970. Cytokinin activity in rose petals and its relation to senescence. *Plant Physiology* **46**, 497–9.
- Mayak S, Halevy AH, Katz M. 1972. Correlative changes in phytohormones in relation to senescence processes in rose petals. *Physiologia Plantarum* **27**, 1–4.
- McKenzie RJ, Lovell PH. 1992a. Flower senescence in monocotyledons: a taxonomic survey. *New Zealand Journal of Crop and Horticultural Science* **20**, 67–71.
- McKenzie RJ, Lovell PH. 1992b. Perianth abscission in montbretia (*Crocsmia x crocosmiiflora*). *Annals of Botany* **69**, 199–207.
- Melotto E, Greve LC, Labavitch JM. 1994. Cell wall metabolism in ripening fruit. VII. Biologically active pectin oligomers in ripening tomato (*Lycopersicon esculentum* Mill.) fruits. *Plant Physiology* **106**, 575–81.
- Miranda RM, Carlson WH. 1982. Chemical control of petal abscission in hybrids of *Pelargonium x hortorum* Bailey 'Sprinter Scarlet'. *Proceedings of the Tropical Region - American Society for Horticultural Science* **25**, 241–52. (in Portuguese, with summary in English)
- Moline HE, LaMotte CE, Gochnauer C, McNamer A. 1972. Further comparative studies on pectin esterase in relation to leaf and flower abscission. *Plant Physiology* **50**, 655–9.
- Moncur MW, Boland DJ. 1989. Floral morphology of *Eucalyptus melliodora* A.Cunn. ex Schau. and comparisons with other Eucalypt species. *Australian Journal of Botany* **37**, 125–35.
- Monterroso VA, Wien HC. 1990. Flower and pod abscission due to heat stress in beans. *Journal of the American Society for Horticultural Science* **115**, 631–4.
- Mor Y, Halevy AH, Kofranek AM, Reid MS. 1984a. Post-harvest handling of lily of the Nile flowers. *Journal of the American Society for Horticultural Science* **109**, 494–7.
- Mor Y, Reid MS, Kofranek AM. 1984b. Pulse treatments with silver thiosulfate and sucrose improve the vase life of sweet peas. *Journal of the American Society for Horticultural Science* **109**, 866–8.
- Namikawa I. 1926. Contributions to the knowledge of abscission and exfoliation of floral organs. *Journal of the College of Agriculture, Hokkaido Imperial University* **17**, 63–131.
- Nightingale GT, Farnham RB. 1936. Effects of nutrient concentration on anatomy, metabolism, and bud abscission of sweet pea. *Botanical Gazette* **97**, 477–517.
- Oberholster SD, Peterson CM, Dute RR. 1991. Pedicel abscission of soybean: cytological and ultrastructural changes induced by auxin and ethephon. *Canadian Journal of Botany* **69**, 2177–86.

- Ojehomon, OO.** 1972. Fruit abscission in cowpea *Vigna unguiculata* (L.) Walp. I. Distribution of  $^{14}\text{C}$ -assimilates in the inflorescence, and comparative growth of ovaries from persisting and abscising open flowers. *Journal of Experimental Botany* **23**, 751–61.
- Osborne DJ.** 1989. Abscission. *CRC Critical Reviews in Plant Sciences* **8**, 103–29.
- Osborne DJ, Sargent JA.** 1976. The positional differentiation of ethylene-responsive cells in rachis abscission zones in leaves of *Sambucus nigra* and their growth and ultrastructural changes at senescence and separation. *Planta* **132**, 203–10.
- Osborne DJ, Wain RL.** 1951. Studies on plant growth regulating substances. III. The production of parthenocarpic pomaceous fruits by chemical treatments. *Journal of Horticultural Science* **26**, 317.
- Pate JS, Farrington P.** 1981. Fruit set in *Lupinus angustifolius* cv. Unicrop. II. Assimilate flow during flowering and early fruiting. *Australian Journal of Plant Physiology* **8**, 307–18.
- Patterson SE, Huelster SM, Bleecker A.** 1994. Floral organ abscission in *Arabidopsis thaliana*. *Plant Physiology* **105**, Supplement 43, Abstract 181.
- Pfeiffer H.** 1927. Neue Untersuchungen über die Trennungsgewebe zur Ablösung pflanzlicher Organe. III. Zur Anatomie der Trennungsgewebe an männlichen Blüten von *Vallisneria spiralis* und anderen Ephydrogamicae. *Mikrokosmos* **20**, 144–46.
- Pfeiffer H.** 1928. Die pflanzlichen Trennungsgewebe. In: Linsbauer K, ed. *Handbuch der Pflanzen-anatomie*. Abteilung 1, Teil 2: *Histologie*. Band V. Lief. 22. Berlin: Gebrüder Borntraeger.
- Poehlman JM.** 1991. *The mungbean*. Boulder CO: Westview Press.
- Porter NG.** 1977. The role of abscisic acid in flower abscission of *Lupinus luteus*. *Physiologia Plantarum* **40**, 50–4.
- Redgwell RJ, Fry SC.** 1993. Xyloglucan endotransglycosylase activity increases during kiwifruit (*Actinidia deliciosa*) ripening. Implications for fruit softening. *Plant Physiology* **100**, 1318–25.
- Reiche C.** 1885. Über anatomische Veränderungen, welche in den Perianthkreisen der Blüten während der Entwicklung der Frucht vor sich gehen. *Jahrbücher für wissenschaftliche Botanik* **16**, 638–87.
- Rewinkel-Jansen MJH.** 1985. Flower and bud abscission of *Streptocarpus* and the use of ethylene sensitivity inhibitors. *Acta Horticulturae* **181**, 419–24.
- Rick C.** 1956. New mutants. *Report of the Tomato Genetics Cooperative* **6**, 22–3.
- Roberts JA, Schindler CB, Tucker GA.** 1984. Ethylene-promoted tomato flower abscission and the possible involvement of an inhibitor. *Planta* **160**, 164–7.
- Romano CP, Cooper ML, Klee HJ.** 1993. Uncoupling auxin and ethylene effects in transgenic tobacco and *Arabidopsis* plants. *The Plant Cell* **5**, 181–9.
- Rylski I, Sigelman M.** 1982. Effects of different diurnal temperature combinations on fruit set of sweet pepper. *Scientia Horticulturae* **17**, 101–6.
- Samimy C.** 1978. Effect of light on ethylene production and hypocotyl growth of soybean seedlings. *Plant Physiology* **61**, 772–4.
- Scott PC, Webster BD, Leopold AC.** 1964. Formation of tyloses during bean leaf abscission. *Plant Physiology* **39**, Supplement, xiv.
- Serek M, Sisler EC, Tirosh T.** 1995. 1-Methylcyclopropene prevents bud, flower, and leaf abscission of Geraldton waxflower. *HortScience* **30**, 1310.
- Sexton R, Durbin ML, Lewis LN, Thompson WW.** 1981. The immunological localization of 9.5 cellulase in abscission zones of bean (*Phaseolus vulgaris* cv. Red Kidney). *Protoplasma* **109**, 335–41.
- Sexton R, Jamieson GGC, Allan MHIL.** 1977. An ultrastructural study of abscission zone cells with special reference to the mechanism of enzyme secretion. *Protoplasma* **91**, 369–87.
- Sexton R, Porter AE, Littlejohns S.** 1995. Effects of diazocyclopentadiene (DACP) and silver thiosulphate (STS) on ethylene-regulated abscission of sweet pea flowers (*Lathyrus odoratus* L.). *Annals of Botany* **75**, 337–42.
- Sexton R, Roberts JA.** 1982. Cell biology of abscission. *Annual Reviews of Plant Physiology* **33**, 133–62.
- Sexton R, Struthers WA, Lewis LN.** 1983. Some observations on the very rapid abscission of the petals of *Geranium robertianum* L. *Protoplasma* **116**, 179–86.
- Seymour GB, Gross KC.** 1996. Cell wall disassembly and fruit softening. *Postharvest News and Information* **7**(3), 45–52.
- Shiraishi M, Yanagisawa T.** 1988. Anatomical and histochemical studies of starch distribution during abscission of filaments and petals of Wase satsume Mandarin. *Journal of the Japanese Society for Horticultural Science* **56**, 365–74.
- Simons RK.** 1973. Anatomical changes in abscission of reproductive structures. In: Kozłowski TT, ed. *Shedding of plant parts*. New York: Academic Press, 383–434.
- Simons RK, Hewetson FN, Chu MC.** 1970. Fruit tissue injury by frost to 'York Imperial' apples. *Journal of the American Society for Horticultural Science* **95**, 821–7.
- Sipes DL, Einset JW.** 1982. Role of ethylene in stimulating stylar abscission in pistil explants of lemon. *Physiologia Plantarum* **56**, 6–10.
- Smith CJS, Watson CF, Ray J, Bird CR, Morris PC, Schuch W, Grierson D.** 1988. Antisense RNA inhibition of polygalacturonase gene expression in transgenic tomatoes. *Nature* **334**, 724–6.
- Stead AD.** 1985. The relationship between pollination, ethylene production and flower senescence. In: Roberts JA, Tucker GA, eds. *Ethylene and plant development*. London: Butterworths, 71–82.
- Stead AD, Moore KG.** 1983. Studies on flower longevity in *Digitalis*. II. The role of ethylene in corolla abscission. *Planta* **157**, 15–21.
- Stephenson AG.** 1981. Flower and fruit abortion: proximate causes and ultimate functions. *Annual Review of Ecology and Systematics* **12**, 253–79.
- Struckmeyer BE, Roberts RH.** 1950. A possible explanation of how naphthalene acetic acid thins apples. *Proceedings of the American Society for Horticultural Science* **49**, 76–8.
- Swanson BT, Wilkins HF, Weiser CF, Klein I.** 1975. Endogenous ethylene and abscisic acid relative to phytochrome. *Plant Physiology* **55**, 370–6.
- Tieman DM, Harriman RW, Ramamohan G, Handa AK.** 1992. An antisense pectin methyltransferase gene alters pectin chemistry and soluble solids in tomato fruit. *The Plant Cell* **4**, 667–79.
- Tripp KE, Wien HC.** 1989. Screening with ethephon for abscission resistance of flower buds in bell pepper. *HortScience* **24**, 655–6.
- Tucker GA, Mitchell J.** 1993. Cell walls, structure, utilization and manipulation. In: Grierson D, ed. *Biosynthesis and manipulation of plant products*. London: Blackie, 91–9.
- Tucker GA, Schindler CB, Roberts JA.** 1984. Flower abscission in mutant tomato plants. *Planta* **160**, 164–7.
- Tucker ML, Milligan SB.** 1991. Sequence analysis and comparison of avocado fruit and bean abscission cellulases. *Plant Physiology* **95**, 928–33.
- Tucker ML, Sexton R, del Campillo E, Lewis LN.** 1988. Bean



- abscission cellulase. Characterization of a cDNA clone and regulation of gene expression by ethylene and auxin. *Plant Physiology* **88**, 1257–62.
- Turner AD, Wien HC.** 1994. Dry matter assimilation and partitioning in pepper cultivars differing in susceptibility to stress-induced bud and flower abscission. *Annals of Botany* **73**, 617–22.
- Valdovinos JG, Jensen TE.** 1968. Fine structure of abscission zones. II. Cell-wall changes in abscising pedicels of tobacco and tomato flowers. *Planta* **83**, 295–302.
- Valdovinos FG, Jensen TE.** 1973. Abscission: modification of the endoplasmic reticula of abscission cells by ethylene. *Plant Physiology* **51**, Supplement, 29.
- Valdovinos JG, Jensen TE, Lieberman SJ.** 1985. An ultrastructural and physiological study of the effects of actinomycin D and cycloheximide on abscission of tobacco flower pedicels. *Botanical Gazette* **146**, 308–14.
- Valdovinos JG, Jensen TE, Sicko LM.** 1972. Fine structure of abscission zones. IV. Effect of ethylene on the ultrastructure of abscission cells of tobacco and tomato flower pedicels. *Planta* **102**, 324–33.
- van Doorn WG, Perik RRJ, Belde PJM.** 1993. Effects of surfactants on the longevity of dry-stored cut flowering stems of rose, *Bouvardia*, and *Astilbe*. *Postharvest Biology and Technology* **3**, 69–76.
- van Doorn WG, Schröder C.** 1995. The abscission of rose petals. *Annals of Botany* **76**, 539–44.
- van Doorn WG, Vojinovic A.** 1996. Petal abscission in rose flowers: effects of water potential, light intensity and light quality. *Annals of Botany* **78**, 619–23.
- van Doorn WG, Woltering EJ.** 1991. Developments in the use of growth regulators for the maintenance of post-harvest quality in cut flowers and potted plants. *Acta Horticulturae* **298**, 195–208.
- van Leeuwen PJ.** 1985. Postharvest treatment of *Euphorbia fulgens*. *Acta Horticulturae* **181**, 467–9.
- van Lieburg MJ, van Doorn WG, van Gelder H.** 1990. Prevention of phytochrome-related post-harvest loss of quality in ornamentals through red light emitted by diodes. *Acta Horticulturae* **272**, 347–51.
- van Overbeek J.** 1952. Agricultural application of growth regulators and their physiological basis. *Annual Reviews of Plant Physiology* **3**, 87–108.
- von Guttenberg H.** 1926. Die Bewegungsgewebe. In: Linsbauer K, ed. *Handbuch der Pflanzen anatomie*. Abteilung 1, Teil 2: *Histologie*. Band V. Lief. 18. Gebrüder Borntraeger Verlag, Berlin.
- von Mohl H.** 1860. Über den Ablösungsprozess saftiger Pflanzenorgane. *Botanische Zeitung* **18**, 273–7.
- von Wettstein R.** 1916. Das Abschleudern der männlichen Blüten bei *Mercurialis*. *Berichte der Deutschen botanische Gesellschaft* **34**, 829–36.
- Wacker H.** 1911. Physiologische und morphologische Untersuchungen über das Verblühen. *Jahrbücher für wissenschaftliche Botanik* **49**, 522–78.
- Wallner SJ, Kassalen R, Burgood J, Craig R.** 1979. Pollination, ethylene production and shattering in geraniums. *HortScience* **14**, 446.
- Wang CY, Baker JE, Hardenburg RE, Lieberman M.** 1977. Effects of two analogs of rhizobitoxine and sodium benzoate on senescence of snapdragons. *Journal of the American Society for Horticultural Science* **102**, 517–20.
- Warne LGG.** 1947. Bud and flower dropping in lupine. *Journal of the Royal Horticultural Society* **62**, 193–5.
- Weaver RJ, Pool RM.** 1969. Effect of ethrel, abscisic acid, and a morphactin on flower and berry abscission and shoot growth in *Vitis vinifera*. *Journal of the American Society for Horticultural Science* **94**, 474–8.
- Webster BD.** 1968. Anatomical aspects of abscission. *Plant Physiology* **43**, 1512–44.
- Webster BD.** 1973. Ultrastructural studies of abscission in *Phaseolus*: ethylene effects on cell walls. *American Journal of Botany* **60**, 436–47.
- Webster, BD, Chiu HW.** 1975. Ultrastructural studies of abscission in *Phaseolus*: characteristics of the floral abscission zone. *Journal of the American Society for Horticultural Science* **100**, 613–18.
- Weis KG, Goren R, Martin GC, Webster BD.** 1988. Leaf and inflorescence abscission in olive. I. Regulation by ethylene and ethephon. *Botanical Gazette* **149**, 391–7.
- Wiatr SM.** 1978. Physiological and structural investigation of petal abscission in *Linum lewisii*. PhD thesis. University of California, Davis.
- Wien HC.** 1990. Screening pepper cultivars for resistance to flower abscission: a comparison of techniques. *HortScience* **25**, 1634–6.
- Wien HC, Turner AD, Ho CJ.** 1992. The influence of auxin transport inhibitor placement on stress-induced flower abscission in *Capsicum*. In: Karszen CM, van Loon LC, Vreugdenhil D, eds. *Progress in plant growth regulation*. Dordrecht: Kluwer, 446–52.
- Wien HC, Turner AD, Yang SF.** 1989. Hormonal basis for low light intensity-induced flower bud abscission of pepper. *Journal of the American Society for Horticultural Science* **114**, 981–5.
- Wien HC, Zhang Y.** 1991. Prevention of flower abscission in bell pepper. *Journal of the American Society for Horticultural Science* **116**, 516–19.
- Woltering EJ.** 1986. *Review of the effects of ethylene on green and flowering pot plants*. Report 2328., Wageningen, Holland: Sprenger Institute, 39pp (in Dutch).
- Woltering EJ.** 1987. Effects of ethylene on ornamental pot plants: a classification. *Scientia Horticulturae* **31**, 283–94.
- Woltering EJ, van Doorn WG.** 1988. Role of ethylene in senescence of petals—morphological and taxonomical relationships. *Journal of Experimental Botany* **39**, 1605–16.
- Yager RE.** 1957. The mechanism of floral abscission in *Nicotiana*. PhD thesis, University of Iowa, Iowa City, IA, USA.
- Yager RE, Muir RM.** 1958. Interaction of methionine and indoleacetic acid in the control of abscission in *Nicotiana*. *Proceedings of the Society for Experimental Biology, New York* **99**, 321–3.
- Zieslin N, Gottesman V.** 1983. Involvement of ethylene in abscission of flowers and petals of *Leptospermum scoparium*. *Physiologia Plantarum* **58**, 114–18.
